# Supplementary material for: Hepatitis B vaccination coverage, knowledge and sociodemographic determinants of uptake in high risk public safety workers in Kaduna State, Nigeria: a cross sectional survey
Source: PubMed Central journal article supplement (PMC5541342; doi:10.1136/bmjopen-2017-015845), 2017-06-02
Supplement: bmjopen-2017-015845.draft_revisions.pdf [file bmjopen-2017-015845.draft_revisions.pdf]

# BMJ Open

## Survey of Hepatitis B Vaccination Coverage, and Knowledge and Socio-Demographic Determinants of Uptake in Members of the Federal Road Safety Corps, Kaduna State, Nigeria

|                                 |                                                                                                                 |
|---------------------------------|-----------------------------------------------------------------------------------------------------------------|
| Journal:                        | <i>BMJ Open</i>                                                                                                 |
| Manuscript ID                   | bmjopen-2017-015845                                                                                             |
| Article Type:                   | Research                                                                                                        |
| Date Submitted by the Author:   | 03-Jan-2017                                                                                                     |
| Complete List of Authors:       | Ochu, Chinwe; Ahmadu Bello University Teaching Hospital, Family Medicine Beynon, Caryl; University of Liverpool |
| <b>Primary Subject Heading</b>: | Public health                                                                                                   |
| Secondary Subject Heading:      | Epidemiology, Occupational and environmental medicine, Infectious diseases                                      |
| Keywords:                       | Infection control < INFECTIOUS DISEASES, Hepatitis B virus, Vaccination coverage, Public safety workers         |
|                                 |                                                                                                                 |

SCHOLARONE™  
Manuscripts

1  
2  
3 **Survey of Hepatitis B Vaccination Coverage, and Knowledge and Socio-**  
4 **Demographic Determinants of Uptake in Members of the Federal Road Safety**  
5 **Corps, Kaduna State, Nigeria**  
6  
7  
8  
9

10  
11 **Corresponding Author:** Ochu, Chinwe Lucia

12 **Department:** Family Medicine

13 **Institution:** Ahmadu Bello University Teaching Hospital

14 **City:** Zaria

15 **State:** Kaduna State

16 **Postal code:** 810105

17 **Country:** Nigeria

18 **Emails:** [lucia.ochu@online.liverpool.ac.uk](mailto:lucia.ochu@online.liverpool.ac.uk); [luciaocho@yahoo.com](mailto:luciaocho@yahoo.com)

19 **Phone:** +2348027413202

20  
21  
22  
23  
24  
25  
26  
27  
28 **Co-Author:** Beynon, Caryl M.

29 **Department:** Public Health

30 **Institution:** University of Liverpool (online)

31 **Country:** United Kingdom

32 **Email:** [caryl.beynon@online.liverpool.ac.uk](mailto:caryl.beynon@online.liverpool.ac.uk)

33 **Phone:** NA

34  
35  
36  
37  
38  
39  
40 **Word Counts:** Abstract: 295; Main text: 3956 (excluding title page, statements, abstract, article  
41 summary, tables, acknowledgment, text box and references).

42 **Number of tables:** 5

43 **Number of references:** 39

44 **Number of supplementary files (appendices) for online only publication:** 3  
45  
46  
47  
48  
49  
50  
51  
52  
53  
54  
55  
56  
57  
58  
59  
60

## STATEMENTS

**Contributorship:** This study was carried out as a dissertation research by CLO under the close supervision of CMB, in partial fulfillment of the requirement for the award of the degree of Master of Public Health by the University of Liverpool, United Kingdom. CLO collected the data and conducted the analyses. These were reviewed by CMB. The manuscript was drafted by CLO and reviewed and revised by CMB. Both authors approved the final version for publication.

**Competing Interests:** None declared.

**Funding:** This research received no specific grant from any funding agency in the public, commercial or not-for-profit sectors.

**Ethics Approval:** This study was approved by the University of Liverpool's Ethics Committee and the Ethics Committee of Kaduna State Ministry of Health.

**Participant Consent:** Obtained

**Additional Data:** The table showing the frequency of available and missing data for the study variables is uploaded as a supplementary document. Dataset is available at Dryad data repository via this link:

## 1 ABSTRACT

2  
3  
4  
5  
6  
7  
8 **Objectives:** To estimate hepatitis B vaccination coverage, and knowledge and socio-  
9  
10 demographic determinants of full-dose uptake in Federal Road Safety Corps (FRSC) members,  
11  
12 Kaduna State, Nigeria in order to inform relevant targeted vaccination policies.

13  
14  
15 **Design:** A cross-sectional survey of FRSC members, Kaduna Sector Command.

16  
17  
18 **Settings:** Six randomly-selected Unit Commands under Kaduna Sector Command, Kaduna State,  
19  
20  
21  
22  
23  
24  
25  
26  
27  
28  
29  
30  
31  
32  
33  
34  
35  
36  
37  
38  
39  
40  
41  
42  
43  
44  
45  
46  
47  
48  
49  
50  
51  
52  
53  
54  
55  
56  
57  
58  
59  
60  
Nigeria.

9 **Participants:** Pilot-tested structured self-administered questionnaire was administered to 341  
10  
11 participants aged 18 years and above with  $\geq 6$  months of service between 17<sup>th</sup> June and 22<sup>nd</sup> July,  
12  
13 2015. Excluded were FRSC members in RS1 Zonal Command headquarters as the Zonal  
14  
15 Command includes other States beyond the study scope.

16  
17  
18  
19  
20  
21  
22  
23  
24  
25  
26  
27  
28  
29  
30  
31  
32  
33  
34  
35  
36  
37  
38  
39  
40  
41  
42  
43  
44  
45  
46  
47  
48  
49  
50  
51  
52  
53  
54  
55  
56  
57  
58  
59  
60  
**Primary Outcome:** Hepatitis B vaccination status of participants categorized as 'not vaccinated'  
for uptake of  $< 3$  doses and 'vaccinated' for uptake of  $\geq 3$  doses.

15  
16  
17  
18  
19  
20  
21  
22  
23  
24  
25  
26  
27  
28  
29  
30  
31  
32  
33  
34  
35  
36  
37  
38  
39  
40  
41  
42  
43  
44  
45  
46  
47  
48  
49  
50  
51  
52  
53  
54  
55  
56  
57  
58  
59  
60  
**Analysis:** Descriptive analysis estimated hepatitis B vaccination coverage while logistic  
regression ascertained associations.

17  
18  
19  
20  
21  
22  
23  
24  
25  
26  
27  
28  
29  
30  
31  
32  
33  
34  
35  
36  
37  
38  
39  
40  
41  
42  
43  
44  
45  
46  
47  
48  
49  
50  
51  
52  
53  
54  
55  
56  
57  
58  
59  
60  
**Results:** Any dose hepatitis B vaccination coverage was 60.9%; full-dose coverage was 30.5%.  
Less than 47% of participants scored above hepatitis B virus (HBV) and hepatitis B vaccination  
mean knowledge scores. Female sex (AOR 2.28, 95% CI 1.15-4.52,  $p < 0.05$ ), perceiving there to  
be an occupational risk of exposure to HBV (AOR 2.86, 95% CI 1.06-7.70,  $p < 0.001$ ), and  
increasing hepatitis B vaccination knowledge (AOR 2.68, 95% CI 1.83-3.92,  $p < 0.001$ ) were

1  
2  
3 22 independent predictors of full-dose hepatitis B vaccination in FRSC members, Kaduna Sector  
4  
5 23 Command.

6  
7  
8 24 **Conclusions:** Hepatitis B vaccination coverage and knowledge are poor among FRSC members,  
9  
10 25 Kaduna Sector Command. Institutionalizing free hepatitis B vaccination could improve uptake  
11  
12 26 among FRSC members. Educational intervention, geared towards improving FRSC members'  
13  
14 27 knowledge of hepatitis B vaccination and perception of risk of occupational exposure to HBV, is  
15  
16 28 recommended for these vulnerable public safety workers. Such enlightenment could be a cheap  
17  
18 29 and easy way of improving hepatitis B vaccination coverage in the study population.

19  
20  
21 30 **Keywords:** infection control; hepatitis B virus; vaccination coverage; public safety workers

## 22 31 **ARTICLE SUMMARY**

### 23 32 **Strengths and Limitations of this Study**

- 24  
25  
26  
27  
28  
29 33 • This is the first study to estimate hepatitis B vaccination coverage of public safety  
30  
31 34 workers such as the Federal Road Safety Corps in Nigeria despite these workers being  
32  
33 35 occupationally exposed to hepatitis B virus.
- 34  
35  
36 36 • The participating Unit Commands were randomly selected and the study had a high  
37  
38 37 response rate hence minimizing selection bias and improving the generalizability of the  
39  
40 38 research findings.
- 41  
42  
43 39 • Retrospective studies are prone to recall bias; this was mitigated in this study by omitting  
44  
45 40 inconsistent data suggestive of guessing at the analysis stage.
- 46  
47  
48 41 • Researcher bias was mitigated by the use of a pre-validated data collection instrument  
49  
50 42 and by pre-determining analytical strategies before data collection while confounding  
51  
52 43 was minimized through multivariate analysis.
- 53  
54  
55  
56  
57  
58  
59  
60

- 1  
2  
3 44 • Missing data made sample size in multivariate analysis less than the pre-research  
4  
5 45 estimate, though the proportion analyzed constituted a good representation of the entire  
6  
7 46 study population.  
8  
9

## 11 47 INTRODUCTION

14 48 Hepatitis B virus (HBV) is a highly infectious blood-borne pathogen usually transmitted via  
15  
16 49 percutaneous or mucosal exposure to infected blood and body fluids.[1] It is notorious for its  
17  
18 50 chronic carrier deadly sequel of liver cirrhosis and hepatocellular carcinoma.[2] HBV infection  
19  
20 51 affects about one third of the world's population with over 350 million persons being chronic  
21  
22 52 carriers.[3] This results in >2 million deaths from chronic liver diseases annually.[4] Sub-  
23  
24 53 Saharan Africa and East Asia have the highest HBV prevalence with about 5-10% of the entire  
25  
26 54 adult population having chronic infections.[1]  
27  
28

31 55 Percutaneous exposures to HBV occur in adulthood either accidentally or through unsafe  
32  
33 56 practices.[3] Transmissions via needle-stick and sharps injuries are frequent occurrences among  
34  
35 57 health practitioners and vulnerable public safety workers (PSWs).[5-7] PSWs' occupational risk  
36  
37 58 of HBV infection depends on their level of blood-skin exposure.[8-10] Woodruff et al. estimated  
38  
39 59 1.9 times (95% confidence interval (CI) 1.1-3.3) increased risk of infection with HBV in PSWs  
40  
41 60 with blood-skin exposure than in their counterparts without such exposure.[10] The risk of  
42  
43 61 transmission from infected blood is said to be 100 times more for HBV than for HIV in non-  
44  
45 62 immune individuals.[2]  
46  
47  
48  
49

50 63 Prevention of new HBV infections in adulthood is a recognized global public health priority.[3]  
51  
52 64 Hepatitis B vaccination (HBVc) is the most effective way of controlling HBV infection.[3] The  
53  
54 65 World Health Organization (WHO) prescribes universal HBVc of healthcare workers (HCWs)  
55  
56  
57

1  
2  
3 66 and PSWs with frequent exposure to blood.[11] A standard three-dose vaccine regimen, with the  
4  
5 67 second and third doses given one month and six months apart from the initial dose respectively,  
6  
7  
8 68 is very effective in conferring immunity against HBV.[12] In healthy vaccinated adults,  
9  
10 69 immunologic memory against HBV is retained for  $\geq 20$  years.[12]  
11

12  
13 70 Nigeria is hyperendemic for HBV, with a chronic carrier prevalence rate of up to 39%.[4,6,13]  
14  
15 71 This prevalence is  $>4$  times that noted in black South Africans (9.6%).[14] This status poses a  
16  
17  
18 72 great risk of occupational exposure to HBV for HCWs and PSWs with regular blood-skin  
19  
20 73 contact, though this risk is yet to be estimated in any Nigerian study.  
21  
22

23 74 The Federal Road Safety Corps (FRSC) was established by the Federal Government of Nigeria  
24  
25 75 in 1988 due to the high rate of road traffic crashes (RTCs) in the country.[15] Included in the  
26  
27  
28 76 road safety functions of FRSC are the rescue and emergency care of RTC victims which brings  
29  
30 77 them in regular contact with blood.[15] The objectives of this study were to estimate HBVc  
31  
32 78 coverage, and knowledge and socio-demographic determinants of full-dose uptake in FRSC  
33  
34  
35 79 members in Kaduna State, Nigeria, in order to inform relevant targeted vaccination policies.  
36  
37

## 38 80 **METHODS**

39  
40  
41 81 **Study Design:** A quantitative cross-sectional survey of FRSC members, KSC, Nigeria.  
42  
43

44 82 **Setting and Target Population:** Kaduna State is the third most populous State in Nigeria and  
45  
46 83 has 3 senatorial zones with 23 local government areas (LGAs).  
47  
48

49 84 The FRSC is divided into 12 Zonal Commands; each Zonal Command has Sector Commands  
50  
51 85 under it with each Sector Command being sub-divided into Unit Commands.[16] There are  
52  
53  
54 86 currently 204 Unit Commands in Nigeria.[16] The first 11 Unit Commands are located in the  
55  
56  
57

87 KSC with the KSC headquarters making them 12 and these cover the entire 23 LGAs in Kaduna  
88 State (Table 1).

89 **Table 1: Location, Coverage and Staff Distribution of Unit Commands (UCs) of FRSC, Kaduna**  
90 **Sector Command, Nigeria, June-July, 2015.**

| Commands                                 | Designation  | Staff Strength |            |            | Number of LGAs Covered | Location (LGA) |
|------------------------------------------|--------------|----------------|------------|------------|------------------------|----------------|
|                                          |              | Cadre          |            |            |                        |                |
|                                          |              | Officer        | Marshal    | Total      |                        |                |
| Kaduna Sector Command (KSC) Headquarters | RS1.1        | 46             | 118        | 164        | 2                      | Kaduna North   |
| Kafanchan UC                             | RS1.11       | 15             | 44         | 59         | 4                      | Jama'a         |
| Birnin Gwari UC                          | RS1.12       | 17             | 35         | 52         | 1                      | Birnin Gwari   |
| Zaria UC                                 | RS1.13       | 24             | 66         | 90         | 5                      | Sabon Gari     |
| Saminaka UC                              | RS1.14       | 10             | 36         | 46         | 1                      | Lere           |
| Sabon Tasha UC                           | RS1.15       | 16             | 52         | 68         | 1                      | Chikun         |
| Kakau UC                                 | RS1.16       | 18             | 66         | 84         | 2                      | Chikun         |
| Birnin Yero UC                           | RS1.17       | 15             | 44         | 59         | 1                      | Igabi          |
| Gwantu UC                                | RS1.18       | 8              | 31         | 39         | 2                      | Sanga          |
| Katari UC                                | RS1.19       | 19             | 37         | 56         | 1                      | Kachia         |
| Kachia UC                                | RS1.110      | 10             | 26         | 36         | 2                      | Kachia         |
| Tashan Yari UC                           | RS1.111      | 10             | 26         | 36         | 1                      | Makarfi        |
|                                          | <b>Total</b> | <b>208</b>     | <b>580</b> | <b>789</b> | <b>23</b>              |                |

91  
92 KSC is one of the four Sector Commands that make up the RS1 Zonal Command whose  
93 headquarters is in Kaduna. There were 789 FRSC members in KSC at the time of this study.  
94 Two major cadres exist in FRSC: Officer and Marshal, though the latter is sub-divided into  
95 Marshal Inspectorate and Road Marshal Assistant. 26% (208/789) of FRSC members, KSC are



1  
2  
3 96 Officers while 74% (580/789) are Marshals. The study was carried out in six randomly selected  
4  
5 97 Unit Commands: KSC headquarters, Saminaka, Kakau, Gwantu, Katari, and Kachia.

6  
7  
8 98 **Inclusion and Exclusion Criteria:** Only FRSC members in KSC aged 18 years and above with  
9  
10 99  $\geq 6$  months of service were included in the study. This ensured that only adults long enough in  
11  
12 100 service to be made aware of the risk of HBV were surveyed. FRSC members working in the RS1  
13  
14 101 Zonal Command headquarters were excluded from the study as the Zonal Command includes  
15  
16 102 other States beyond the study scope.

17  
18  
19  
20  
21 103 **Sample Size:** This was estimated using the formula for cross-sectional surveys:  $n = 1.96^2 \times p(1-$   
22  
23 104  $p)/d^2$ , where  $n$  is the required sample size,  $p$  is prevalence estimate of HBVc in previous studies,  
24  
25 105 and  $d$  is precision or acceptable error margin (5%).[17] Ogoina et al.'s prevalence estimate of  
26  
27 106 36.2% in a survey of 290 HCWs in Nigeria[6] was used as proxy since there is no existing study  
28  
29 107 on PSWs in Nigeria. Anticipating a lower prevalence rate among non-HCWs with expectedly  
30  
31 108 lower level of awareness of HBVc, 30% prevalence was assumed. ( $N = 1.96^2 \times 0.3(1-0.3)/0.5^2 =$   
32  
33 109 323). Using 24% as anticipated non-response rate ( $q$ ),[6] a final sample size of 425 was  
34  
35 110 estimated using the formula:  $N_f = N_s/1-q$ , where  $N_f$  is the final sample size and  $N_s$  the initial  
36  
37 111 sample size.[18]

38  
39  
40  
41  
42 112 **Sampling:** The sampling frame was a list of the 12 Unit Commands from the KSC headquarters.  
43  
44 113 Each Unit Command was considered a cluster. Clusters were randomly selected using a  
45  
46 114 computer-generated set of random numbers until sample size was achieved. This simple random  
47  
48 115 selection of clusters was to ensure representativeness of selected Unit Commands.[19] Six Unit  
49  
50 116 Commands were selected for the study. All FRSC members in the selected Unit Commands were  
51  
52 117 targeted for questionnaire distribution.

1  
2  
3 118 **Data Collection:** Unit Commands of FRSC have compulsory weekly meetings. Permission was  
4  
5 119 obtained for collection of data at these meetings. Data collection took place between 17<sup>th</sup> June  
6  
7 120 and 22<sup>nd</sup> July, 2015. Participant information sheet (PIS) was reviewed with the staff with  
8  
9 121 emphasis on voluntary participation, anonymity and confidentiality of collected data. Inclusion  
10  
11 122 criteria and implied consent were further explained. Completion of questionnaire was considered  
12  
13 123 consent to participate. Participants were asked to seal completed questionnaires in the given  
14  
15 124 envelopes and drop them in a common collection box provided by the researcher. This was to  
16  
17 125 ensure anonymity. Those not willing to participate were asked to drop the sealed uncompleted  
18  
19 126 questionnaires in the box alongside participants. Non-responders were therefore not identified  
20  
21 127 during data collection. Two Unit Commands (KSC Headquarters & Kakau) were re-visited in  
22  
23 128 subsequent meetings due to poor initial attendance. Routine attendance lists taken by the Unit  
24  
25 129 Commands at the initial meetings were used to prevent re-participation of previous participants.  
26  
27  
28  
29  
30

31 130 **Instruments:** Due to paucity of studies on the research topic, accessing a pre-validated  
32  
33 131 questionnaire for the study was difficult. After an extensive literature search, only Al-Hussami's  
34  
35 132 "Hepatitis B Vaccine Knowledge and Acceptance" questionnaire could be found.[20] This  
36  
37 133 questionnaire has been used for HCWs in United States. It was validated in two pilot studies with  
38  
39 134 testing for inter-reliability but the test statistic was not reported.[20] There were 44 multiple  
40  
41 135 choice questions including some open-ended ones. A structured anonymous self-administered  
42  
43 136 questionnaire was adapted from this questionnaire for the present study (appendix A). Only  
44  
45 137 questions relevant to the research questions were selected. Questions were simplified to suit the  
46  
47 138 literacy status of the study population. The adapted study questionnaire contained 17 questions  
48  
49 139 that elicited information on demographics (sex, age, duration of service, cadre and rank), HBV  
50  
51 140 knowledge and perception of risk of exposure, and HBVc knowledge and status. Though rank  
52  
53  
54  
55  
56  
57  
58  
59  
60

141 was obtained, this was not included in analysis since it mirrors cadre. The questionnaire was  
 142 pilot-tested on FRSC members in RS1 Zonal Command headquarters.

143 **Statistical Analysis:** Table 2 describes the variables in the study.

Table 2: Description of Variables in the Study, FRSC, KSC, Nigeria, June-July, 2015.

| Variable              | Description                                                                                                                                                                                                                                                                                                                                                                    | Type of Data    |
|-----------------------|--------------------------------------------------------------------------------------------------------------------------------------------------------------------------------------------------------------------------------------------------------------------------------------------------------------------------------------------------------------------------------|-----------------|
| Independent Variables |                                                                                                                                                                                                                                                                                                                                                                                |                 |
| Sex                   | This was the gender of study participants categorized as either male or female                                                                                                                                                                                                                                                                                                 | Nominal         |
| Age                   | This variable ascertained the age of participants on their last birthday. It was categorized to enhance anonymity from 18 years which is the age definition of commencement of adulthood to $\geq 50$ years which marks the age before retirement from Nigerian Civil Service at 60 years. The categories included: 18-29 years; 30-39 years; 40-49 years; $\geq 50$ years     | Ordinal         |
| Duration of Service   | This variable elicited how long a respondent had been in service with the Federal Road Safety Corps. It was categorized into: 6 months-2 years (probation period in civil service); 3- 10 years; 11 years to 19 years; and $\geq 20$ years (close to retirement by service year at 35 years).                                                                                  | Ordinal         |
| Cadre                 | This ascertained the official class of participant based on position and seniority in office. There were two major categories: Officers and Marshals with the latter sub-categorized into Marshal Inspectorate and Field Marshal Assistant in a descending order. It also signified educational qualification order with the least educated being the Field Marshal Assistant. | Nominal/Ordinal |
| Risk Perception       | This ascertained the level of perception of occupational risk of exposure to HBV by respondents. It was initially categorized into: No risk of exposure, low risk of exposure, moderate risk of exposure, high risk of exposure, and I don't know. This was later                                                                                                              | Nominal/Ordinal |

Table 2: Description of Variables in the Study, FRSC, KSC, Nigeria, June-July, 2015.

| Variable                              | Description                                                                                                                                                                                                                                                                                                                                                                                                                                                       | Type of Data |
|---------------------------------------|-------------------------------------------------------------------------------------------------------------------------------------------------------------------------------------------------------------------------------------------------------------------------------------------------------------------------------------------------------------------------------------------------------------------------------------------------------------------|--------------|
|                                       | dichotomized for further analysis by merging the 'I don't know' group with the 'no risk' group to form a 'no risk perceived' category with the rest forming the 'risk perceived' category.                                                                                                                                                                                                                                                                        |              |
| HBV Knowledge Score                   | This variable sought to estimate the level of knowledge of basic information on HBV. It includes questions on HBV awareness, seriousness compared to HIV, and route of transmission. For each participant, the number of questions answered correctly was noted as the score (see scoring table in appendix B).                                                                                                                                                   | Continuous   |
| HBVc Knowledge Score                  | This measured the level of basic knowledge of hepatitis B vaccination among participants. It comprised questions on HBVc awareness, effectiveness, recommended full dosage and duration of protection from full-dose vaccination. For each participant, the number of questions answered correctly was noted as the score (appendix B).                                                                                                                           | Continuous   |
| Dependent Variable                    |                                                                                                                                                                                                                                                                                                                                                                                                                                                                   |              |
| Hepatitis B Vaccination (HBVc) Status | Information was elicited on whether participant had ever received HBVc and the number of doses received. Descriptive analysis was done using these data. Dichotomization of data was also done for logistic regression analysis. Since only those with $\geq 3$ doses of HBVc uptake are considered fully protected,[2] those with $\geq 3$ doses were labeled 'vaccinated' and the rest 'not vaccinated'. This was noted as the HBVc status of each participant. | Nominal      |

144

145 All analyses were conducted using statistical package for social sciences version 21. Descriptive  
 146 analysis ascertained frequencies and distributions of data. Histograms showed both HBV  
 147 knowledge and HBVc knowledge scores to be normally distributed, hence their mean and  
 148 standard deviations (SD) were calculated as was the percentage of participants scoring above the

1  
2  
3 149 mean scores. Since the outcome variable (HBVc status) was binary, logistic regression analysis  
4  
5 150 was used in testing for associations with the independent variables (sex, age, duration of service,  
6  
7  
8 151 cadre, risk perception, and HBV and HBVc knowledge scores).[21] To mitigate confounding,  
9  
10 152 univariate analyses were first carried out and the variables identified as significantly associated  
11  
12 153 ( $p < 0.05$ ) with HBVc status were included in the multivariate analysis for independent predictors  
13  
14 154 of full-dose HBVc uptake.[21] Adjusted odds ratios (AOR) with 95% confidence interval (CI)  
15  
16 155 for each variable was computed and significance level set at  $p < 0.05$ . Missing data on each  
17  
18  
19 156 variable were excluded in the analysis of the variable.  
20  
21

## 22 157 **RESULTS**

23  
24  
25 158 354 questionnaires were distributed in the six Unit Commands sampled from FRSC, KSC. 6  
26  
27  
28 159 questionnaires were discarded for having missing data on up to 3 of the independent variables or  
29  
30 160 on the dependent variable and 2 or more independent variables. 7 questionnaires were submitted  
31  
32 161 blank. 341 completed questionnaires were included for analysis, giving a response rate of 96.3%.  
33  
34  
35 162 Appendix C shows percentage of missing data for each of the 14 questions analyzed. Missing  
36  
37 163 data were most frequent on the question on recommended dose of vaccine (9.7%; 33/341)  
38  
39 164 followed by that on the duration of protection from full-dose HBVc (8.5%; 29/341). All  
40  
41 165 participants provided data on cadre. Most respondents were males; aged 30-39 years; had worked  
42  
43  
44 166 between 3-10 years with FRSC; and were of Marshal Cadre (table 3).  
45  
46  
47 167  
48  
49  
50 168  
51  
52  
53 169  
54  
55  
56  
57  
58  
59  
60

Table 3: Socio-Demographic Characteristics of Study Sample of FRSC Members, KSC, Nigeria, June-July, 2015.

| Variable                    | Frequency | Percentage |
|-----------------------------|-----------|------------|
| Sex (n=327)                 |           |            |
| Male                        | 260       | 79.5       |
| Female                      | 67        | 20.5       |
| Age (n=338)                 |           |            |
| 18-29 years                 | 64        | 18.9       |
| 30-39 years                 | 167       | 49.4       |
| 40-49 years                 | 87        | 25.7       |
| ≥50 years                   | 20        | 5.9        |
| Duration of Service (n=339) |           |            |
| 6 months-2 years            | 36        | 10.6       |
| 3-10 years                  | 188       | 55.5       |
| 11-19 years                 | 87        | 25.7       |
| ≥20 years                   | 28        | 8.3        |
| Cadre (n=341)               |           |            |
| Officer                     | 96        | 28.2       |
| Marshal                     | 245       | 71.8       |
| - Marshal Inspectorate      | 111       | 32.6       |
| - Field Marshal Assistant   | 134       | 39.3       |

170

171 **HBV Knowledge:** The mean total number of correct answers to HBV knowledge questions was  
 172 3.0 out of 6.0 (SD 1.5). 46% (157/341) of participants scored above the mean. The proportion of  
 173 correct answers to HBV knowledge questions ranged from 2.1% (7/337) on route of transmission  
 174 of HBV to 93.2% (317/340) on having ever heard of HBV. 22.6% (76/337) of respondents  
 175 answered 'I don't know' to the question pertaining to the route of transmission of HBV and this  
 176 response was the most frequent. Merely 2.1% (7/337) correctly identified contact with infected  
 177 blood and blood-contaminated body fluid as routes of transmission of HBV. Only 4 participants  
 178 (1.2%; n=341) answered all 6 HBV knowledge questions correctly while 16 (4.7%, n=341)

1  
2  
3 179 answered none correctly. HBV infection was perceived as more serious than HIV by most  
4  
5 180 respondents (56.7%; 190/335) while about 3.0% (10/335) felt it was less serious than HIV.  
6  
7  
8 181 20.6% (69/335) claimed no knowledge of the seriousness of HBV compared to HIV while 19.7%  
9  
10 182 (66/335) ascribed equal severity to the two.

11  
12  
13 183 **HBVc Knowledge:** The mean number of correct answers to HBVc questions was 2.0 out of 4.0  
14  
15 184 (SD 1.1). 42.2% (144/341) of participants had scores higher than the mean score. All four  
16  
17 185 questions on HBVc were answered correctly by only 4.1% (14/341) of participants while no  
18  
19 186 correct answer was given by 11.7% (40/341). Rate of correctness ranged from 6.1% (19/312) on  
20  
21 187 question on duration of protection from full-dose HBVc to 86.6% (291/336) on having ever  
22  
23 188 heard of HBVc. Most respondents (62.9%; 210/334) described HBVc as very effective. While  
24  
25 189 6.9% (23/334) rated it slightly effective, 2.7% (9/334) felt it was not effective at all. 27.5%  
26  
27 190 (92/334) of respondents indicated not knowing its effectiveness. 54.9% (169/308) of responding  
28  
29 191 participants correctly identified recommended full HBVc dose as  $\geq 3$  doses while 1.6% (5/308)  
30  
31 192 and 3.9% (12/308) thought it was 1 dose and 2 doses respectively. Up to 39.6% (122/308)  
32  
33 193 indicated not knowing the recommended full dose of HBVc.

34  
35  
36 194 **Perception of Risk of Occupational Exposure to HBV:** While most respondents (55.3%;  
37  
38 195 188/340) rated themselves at high risk of occupational exposure to HBV, 22.4% (76/340) did not  
39  
40 196 know their risk status. 5.3% (18/340) of respondents considered themselves at no risk of  
41  
42 197 exposure to HBV while 5.9% (20/340) and 11.2% (38/340) rated themselves at low and  
43  
44 198 moderate risks of exposure respectively. After dichotomizing this variable into 'no risk  
45  
46 199 perceived' and 'risk perceived' categories, 72.4% (246/340) had some level of risk perception  
47  
48 200 while 27.6% (94/340) had no risk perception for HBV.  
49  
50  
51  
52  
53  
54  
55  
56  
57  
58  
59  
60

1  
2  
3 201 **HBVc Coverage:** Of the 341 participants, 6 did not provide data on their HBVc status. 10 others  
4  
5 202 answered 'yes' to having ever received HBVc but omitted the number of doses received and  
6  
7 203 were therefore inputted as missing data. 325 respondents (95.3%) were included in the sub-  
8  
9 204 analysis. 60.9% (198/325) of the respondents affirmed having ever received  $\geq 1$  dose of HBVc.  
10  
11 205 50.0% of these (99/198) had received  $\geq 3$  doses resulting in full-dose coverage of 30.5% (99/325)  
12  
13 206 among the respondents. 39.1% (127/325) of respondents had never received HBVc. Together  
14  
15 207 with the 99 participants with  $< 3$  doses, 69.5% (226/325) were classified 'not vaccinated' while  
16  
17 208 30.5% (99/325) were labeled 'vaccinated'.  
18  
19  
20  
21

22 209 **Logistic Regression Analyses:** All the variables were significantly associated with HBVc on  
23  
24 210 univariate analyses (table 4) and were included in the multivariate analysis for independent  
25  
26 211 predictors of full-dose HBVc uptake (table 5). Being female was associated with about twice the  
27  
28 212 likelihood of having received full-dose HBVc (table 5). When risk perception was analyzed as a  
29  
30 213 dichotomous variable ('no risk perceived' versus 'risk perceived'), those with any level of risk  
31  
32 214 perception for occupational exposure to HBV were about 3 times more likely to have received  
33  
34 215 full-dose HBVc than those without risk perception for HBV (table 5). Though the odds of being  
35  
36 216 fully vaccinated increased with duration of service, this was not statistically significant. While  
37  
38 217 HBV knowledge was not a significant predictor of full-dose HBVc, knowledge of HBVc was  
39  
40 218 significantly associated with full-dose HBVc with each unit increase in number of correct  
41  
42 219 answers being associated with up to three times increased likelihood of being fully vaccinated  
43  
44 220 (table 5).  
45  
46  
47  
48  
49  
50

51 221  
52  
53

54 222  
55  
56  
57  
58  
59  
60



**Table 4: Univariate Binary Logistic Regression Analyses Showing Unadjusted Odds Ratios of the Association between Independent Variables and Full-Dose Hepatitis B Vaccination Uptake among FRSC Members, KSC, Nigeria, June-July, 2015**

| Independent Variable                             | Sample Size | Odds Ratio | 95% CI (p-value)    |
|--------------------------------------------------|-------------|------------|---------------------|
| Sex                                              | 313         |            |                     |
| Male                                             |             | 1          |                     |
| Female                                           |             | 2.66       | 1.51-4.70 (0.001)   |
| Age                                              | 323         |            |                     |
| 18-29 years                                      |             | 1          |                     |
| 30-39 years                                      |             | 2.08       | 0.97-4.44 (0.059)   |
| 40-49 years                                      |             | 3.30       | 1.47-7.40 (0.004)   |
| ≥50 years                                        |             | 5.67       | 1.84-17.50 (0.003)  |
| Duration of service                              | 323         |            |                     |
| 6 months-2 years                                 |             | 1          |                     |
| 3-10 years                                       |             | 5.69       | 1.31-24.72 (0.020)  |
| 11-19 years                                      |             | 9.48       | 2.12-42.35 (0.003)  |
| ≥20 years                                        |             | 13.39      | 2.61-68.56 (0.002)  |
| Cadre                                            | 325         |            |                     |
| Officer                                          |             | 1          |                     |
| Marshal Inspectorate                             |             | 1.69       | 0.92-3.09 (0.091)   |
| Road Marshal Assistant                           |             | 2.10       | 1.18-3.74 (0.012)   |
| Risk Perception for Occupational Exposure to HBV | 324         |            |                     |
| I don't know                                     |             | 1          |                     |
| No risk                                          |             | 3.92       | 0.78-19.63 (0.096)  |
| Low risk                                         |             | 11.33      | 2.94-43.63 (<0.001) |
| Moderate risk                                    |             | 9.61       | 2.85-32.43 (<0.001) |
| High risk                                        |             | 11.07      | 3.87-31.70 (<0.001) |
| Risk perception for Occupational Exposure to HBV | 324         |            |                     |
| No risk perceived                                |             | 1          |                     |
| Risk perceived                                   |             | 7.39       | 3.27-16.71 (<0.001) |
| HBV Knowledge Score                              | 325         | 1.37       | 1.15-1.62 (<0.001)  |
| HBVc Knowledge Score                             | 325         | 2.97       | 2.16-4.08 (<0.001)  |

223

224

225

**Table 5: Multivariate Binary Logistic Regression Analysis for Independent Predictors of Full-Dose Hepatitis B Vaccination Uptake among Members of FRSC, KSC, Nigeria, June-July, 2015.**

| Independent Variable                             | Adjusted Odds Ratio n=309 | 95% CI (p-value)   |
|--------------------------------------------------|---------------------------|--------------------|
| Sex                                              |                           |                    |
| Male                                             | 1                         |                    |
| Female                                           | 2.28                      | 1.15-4.52 (0.019)  |
| Age                                              |                           |                    |
| 18-29 years                                      | 1                         |                    |
| 30-39 years                                      | 1.40                      | 0.47-4.18 (0.542)  |
| 40-49 years                                      | 0.99                      | 0.28-3.55 (0.987)  |
| ≥50 years                                        | 1.08                      | 0.20-5.76 (0.931)  |
| Duration of service                              |                           |                    |
| 6 months-2 years                                 | 1                         |                    |
| 3-10 years                                       | 2.12                      | 0.39-11.41 (0.384) |
| 11-19 years                                      | 2.73                      | 0.45-16.59 (0.276) |
| ≥20 years                                        | 5.25                      | 0.68-40.47 (0.112) |
| Cadre                                            |                           |                    |
| Officer                                          | 1                         |                    |
| Marshal Inspectorate                             | 1.60                      | 0.77-3.33 (0.208)  |
| Road Marshal Assistant                           | 0.87                      | 0.41-1.85 (0.720)  |
| Risk Perception for Occupational Exposure to HBV |                           |                    |
| I don't know                                     | 1                         |                    |
| No risk                                          | 2.93                      | 0.47-18.41 (0.251) |
| Low risk                                         | 7.12                      | 1.47-34.47 (0.015) |
| Moderate risk                                    | 4.50                      | 1.03-19.63 (0.045) |
| High risk                                        | 3.90                      | 1.08-14.09 (0.038) |
| Risk perception for Occupational Exposure to HBV |                           |                    |
| No risk perceived                                | 1                         |                    |
| Risk perceived                                   | 2.86                      | 1.06-7.70 (<0.001) |
| HBV Knowledge Score                              | 1.03                      | 0.80-1.31 (0.843)  |
| HBVc Knowledge Score                             | 2.68                      | 1.83-3.92 (<0.001) |

226

227 In summary, full-dose HBVc was 30.5% while any dose coverage was 60.9%. Female sex,

228 perceiving their occupation as conveying a risk of HBV, and increasing HBVc knowledge were

1  
2  
3 229 significant independent predictors of full-dose HBVc uptake among members of FRSC in  
4  
5 230 Kaduna State, Nigeria.  
6  
7

## 8 231 **DISCUSSION**

9  
10  
11 232 Like all other studies on HCWs in Nigeria,[13,23-25] this study has further demonstrated high  
12  
13 233 HBVc initiation rate (60.9%) with low completion rate (30.5%). This completion rate implies  
14  
15 234 that only 30.5% of members of the FRSC, KSC were adequately protected against HBV  
16  
17 235 infection.[2] This means that almost 70% of these rescue workers perform their duties without  
18  
19 236 adequate protection from HBV. This also places the accident victims whom they seek to rescue  
20  
21 237 at risk of infection with HBV from infected FRSC members. This could lead to an unbroken  
22  
23 238 cycle of infectivity, morbidity and mortality from HBV in a nation still struggling with the HBV  
24  
25 239 scourge. Poor uptake of HBVc among those at occupational risk of exposure to HBV in Nigeria  
26  
27 240 is a common observation across studies.[13,22-27] Non-existence of a universal HBVc policy in  
28  
29 241 the country for HCWs and vulnerable PSWs could be contributory to poor vaccine uptake.  
30  
31 242 HBVc is sourced individually by workers except for sporadic free immunization programmes in  
32  
33 243 some institutions. Lee et al. demonstrated up to 78% HBVc coverage among a subset of PSWs in  
34  
35 244 United States which has institutionalized HBVc policy for HCWs and vulnerable PSWs.[28] The  
36  
37 245 Centers for Disease Control and Prevention (CDC) recommends routine immunization of HCWs  
38  
39 246 against HBV.[2] Occupational Safety and Health Administration (OSHA) designated police and  
40  
41 247 firefighters as HCWs considering their often adopted role of emergency medical service  
42  
43 248 providers.[7] FRSC members are exposed to blood and sharps injuries from accident scenes.  
44  
45 249 Though there are no statistical estimates from previous studies to quantify their occupational  
46  
47 250 exposure levels, their job descriptions and high prevalence of RTCs in Nigeria presumably place  
48  
49 251 them at high risk of exposure to HBV in this hyperendemic setting.[15,29] In a nation with 39%

1  
2  
3 252 prevalence for chronic HBV,[4] HBVc coverage of 30.5% for FRSC members, KSC is low.  
4  
5 253 OSHA includes workers in public safety institutions among personnel to receive mandatory free  
6  
7 254 HBVc provided at employer's cost as contained in the "Bloodborne Pathogens Standard".[30,31]  
8  
9  
10 255 From this study, it is recommended that the Federal Government of Nigeria, through the Federal  
11  
12 256 Ministry of Health, provide free HBVc to all FRSC staff in KSC who are not yet fully  
13  
14 257 vaccinated, and enact a policy to institutionalize free mandatory HBVc for all unimmunized  
15  
16 258 trainees at the initial basic training programme for newly recruited staff. This will ensure  
17  
18 259 adequate HBVc coverage of FRSC staff before exposure to rescue operations.  
19  
20  
21  
22 260 Among FRSC members, females are 2.28 times more likely to be fully vaccinated against HBV  
23  
24 261 compared to their male counterparts. Osazuwa-Peters et al. observed a similar but insignificant  
25  
26 262 female preponderance in HBVc among dental professionals in Edo State, Nigeria.[32]  
27  
28 263 Contrarily, Adekanle et al., in their survey of HCWs in Ile-Ife, Nigeria, observed 1.8 times  
29  
30 264 increased chances of males receiving HBVc compared to females,[26] although this finding may  
31  
32 265 be due to males in the study being mainly doctors who had the advantage of professional  
33  
34 266 knowledge of HBVc. It is possible that, in the present study, females could be exposed to HBVc  
35  
36 267 knowledge during antenatal hospital visits and while taking their children for immunization.  
37  
38  
39  
40  
41 268 More than 50% of respondents perceived themselves at high risk of occupational exposure to  
42  
43 269 HBV. Disturbingly though, close to a quarter of the study participants claimed no knowledge of  
44  
45 270 their risk status. Together with those who perceived themselves to be at no risk, 27.6% of FRSC  
46  
47 271 members had no risk perception for occupational exposure to HBV while 72.4% perceived  
48  
49 272 themselves at risk. This falls within the range of 30% to 78% risk perception observed in studies  
50  
51 273 among HCWs in Nigeria.[13,27] While the rate of risk perception was high, having  
52  
53 274 approximately 28% with no risk perception for HBV is quite disconcerting from a public health  
54  
55  
56  
57  
58  
59  
60

1  
2  
3 275 perspective considering the blood-skin exposure that rescue of accident victims could entail.  
4  
5 276 Perception of threat of a disease provides cue for action in favour of a health-promoting  
6  
7 277 behaviour.[33] This was demonstrated in this study as those who perceived themselves at risk of  
8  
9 278 occupational exposure to HBV were three times more likely to be vaccinated than those with no  
10  
11 279 risk perception. All risk categories had higher odds of vaccination compared to those without  
12  
13 280 risk perception. It is therefore important that FRSC members understand the risk of exposure to  
14  
15 281 HBV (even if they feel it is low) as this appears to increase their likelihood of getting vaccinated.  
16  
17  
18  
19  
20 282 Knowledge of HBV and HBVc among study participants was poor. Less than 47% of  
21  
22 283 participants scored above the mean knowledge scores for HBV and HBVc. Knowledge was  
23  
24 284 poorest for the route of transmission of HBV and duration of protection from full-dose HBVc.  
25  
26 285 Not knowing the route of transmission of HBV means that FRSC members might not take  
27  
28 286 adequate precautions during rescue operations nor adopt preventive measures against the virus. It  
29  
30 287 could also lead to stigmatization of FRSC members already infected with HBV due to wrong  
31  
32 288 assumption of infectivity through casual contact with their sweat and saliva. HBV knowledge  
33  
34 289 score was however not an independent predictor of HBVc in the study. This conflicts with  
35  
36 290 Adekanle et al.'s observation of twice increased likelihood of complete HBVc among those with  
37  
38 291 good knowledge of HBV in their survey of HCWs in Ile Ife, Nigeria.[26] Their study though did  
39  
40 292 not elicit information on HBVc knowledge as was done in this study. HBVc knowledge could  
41  
42 293 have confounded the demonstrated association between HBV knowledge and HBVc uptake.  
43  
44 294 Only 6.1% of participants knew that full-dose HBVc gives protection for  $\geq 20$  years. This was  
45  
46 295 despite the description of HBVc as very effective by 62.9% of participants. Knowing that  
47  
48 296 receiving  $\geq 3$  doses of the vaccine can give one lifetime protection from HBV could incentivize  
49  
50 297 full-dose uptake among FRSC members. HBVc knowledge was the most significant and precise

1  
2  
3 298 independent predictor of full-dose HBVc in this study. This contradicts Ogoina et al.'s finding of  
4  
5 299 no significant association between knowledge of HBVc and full-dose vaccination among HCWs  
6  
7  
8 300 in two tertiary hospitals in Nigeria.[6] However, they did not ascertain knowledge of vaccine  
9  
10 301 effectiveness and duration of protection from full-dose vaccination.

11  
12  
13 302 Educational programme towards improvement of HBV and HBVc knowledge, and risk  
14  
15 303 perception among FRSC members is a recognized relevant public health intervention from this  
16  
17  
18 304 study. The programme can be included in the schedules of the already existing compulsory  
19  
20 305 weekly in-house training/manpower development of staff and in the routine basic training  
21  
22 306 programme for new staff. Such enlightenment would be a cheap and easy intervention to  
23  
24  
25 307 improve HBVc uptake. Existing evidence on the positive impact of educational intervention on  
26  
27 308 vaccine uptake is however weak.[34] The educational intervention should therefore be rigorously  
28  
29 309 evaluated to ascertain its impact on HBVc uptake in FRSC members.

### 31 32 **Study Strengths and Limitations:** 33

34  
35 311 This was a descriptive cross-sectional survey which limits its suitability for demonstrating  
36  
37  
38 312 temporal relationships between explanatory and outcome variables.[35] It nevertheless shows  
39  
40 313 independent associations useful in understanding predictors of full-dose HBVc in this study  
41  
42 314 population so as to inform relevant public health interventions. Recall bias is another limitation  
43  
44  
45 315 of this retrospective study design as participants may not have remembered accurately their  
46  
47 316 vaccination history, which could have introduced information bias.[36] However, this was  
48  
49 317 addressed at the analysis stage by omitting inconsistent data suggestive of guessing. Simple  
50  
51 318 random sampling using the staff register would have been most ideal in selecting a representative  
52  
53  
54 319 sample with minimal selection bias;[21] this was not feasible considering the disproportionate

1  
2  
3 320 distribution of some of the socio-demographic variables like sex and cadre in the study  
4  
5 321 population. Also, the response rate of 96.3% was impressive and minimizes selection bias  
6  
7 322 wherein non-participants could differ significantly from participants in the study variables.[37]  
8  
9  
10 323 This enhances the generalizability of research findings by improving the external and internal  
11  
12 324 validity of the study.[37] The presence of Unit Commanders and other senior members of staff at  
13  
14 325 the meetings during data collection and their participation in the research could have contributed  
15  
16 326 to the high response rate. Subordinates who ordinarily may not have wished to participate could  
17  
18 327 have felt a psychological obligation to participate with their bosses. This power influence was  
19  
20 328 minimized by the use of PIS which emphasized voluntary participation, and by anonymous data  
21  
22 329 collection procedures. Quantitative studies are prone to researcher bias.[21] This was minimized  
23  
24 330 by the use of a pre-validated questionnaire and by pre-determining analytical strategies before  
25  
26 331 data collection. Possible exchange of information among participants could have introduced  
27  
28 332 information bias. This was mitigated by the presence of the researcher during data collection  
29  
30 333 with prior emphasis on non-communication between participants. Though the study's  
31  
32 334 questionnaire was adapted and pilot-tested to reflect the study context, it was not tested for inter-  
33  
34 335 rater reliability and validity within the study population. Missing data reduced the sample size  
35  
36 336 for the multivariate analysis from 341 to 309. This sample size was less than the pre-study  
37  
38 337 estimate (323) and could lack sufficient power to detect significant associations, hence  
39  
40 338 predisposing to type II error.[21] It however constitutes a randomized 39% (309/789) of the  
41  
42 339 study population, which is a good representation.[38] Confounding, a known menace in  
43  
44 340 observational studies, was minimized at the analytical stage through multivariate logistic  
45  
46 341 regression.[21] The research estimates on the association of varied levels of risk perception with  
47  
48  
49  
50  
51  
52  
53  
54  
55  
56  
57  
58  
59  
60

1  
2  
3 342 full-dose HBVc were not precise, having very wide 95% CIs. This could be due to random errors  
4  
5 343 in the sample.[36] A larger sample size in future studies could yield more precise estimates.  
6  
7

## 8 344 **CONCLUSION**

9  
10  
11 345 Persons with chronic HBV are at 15%-25% risk of premature mortality from the sequels of liver  
12  
13 346 cirrhosis and hepatocellular carcinoma.[39]. Controlling HBV transmission is an important  
14  
15 347 public health issue internationally and in Nigeria where the virus is hyperendemic. HBV  
16  
17 348 infection is a preventable disease and prevention is best achieved with HBVc.[3] FRSC members  
18  
19 349 come in regular contact with blood and are at risk of contracting the virus. HBVc coverage  
20  
21 350 among FRSC members in Kaduna State, Nigeria is low (30.5%). Knowledge of HBV and HBVc  
22  
23 351 is poor in this study population. Female sex, perceiving there to be an occupational risk of  
24  
25 352 exposure to HBV, and increasing HBVc knowledge are independent predictors of HBVc uptake  
26  
27 353 among FRSC members, KSC. Institutionalized free HBVc is recommended for FRSC staff.  
28  
29 354 Educational intervention aimed at creating proper awareness of the occupational risk of HBV  
30  
31 355 and the importance of HBVc, is required to improve HBVc coverage among this vulnerable  
32  
33 356 group of PSWs. Recommended future studies include: a qualitative study to ascertain FRSC  
34  
35 357 members' perception of HBVc and subjective reasons for non-uptake of the vaccine; a sero-  
36  
37 358 prevalence study to determine the actual immune status of FRSC members in KSC and estimate  
38  
39 359 the prevalence of HBV in this study group for appropriate intervention; and validation of  
40  
41 360 questionnaire in the Nigerian context with pretesting and retesting for reliability.  
42  
43  
44  
45  
46  
47  
48

49 361 **ACKNOWLEDGMENTS:** University of Liverpool is acknowledged for providing the  
50  
51 362 platform for this research. We thank the Commonwealth Scholarship Commission for paying the  
52  
53 363 tuition fee for the MPH study of the corresponding author thereby enabling this dissertation  
54  
55  
56  
57  
58  
59  
60



1  
2  
3 364 research. We appreciate the staff and management of the Federal Road Safety Corps, Kaduna  
4  
5 365 Sector Command for their cooperation and participation in this study.  
6  
7

8  
9 366 **REFERENCES**

- 10  
11 367 1. World Health Organization (WHO). Hepatitis B *WHO* 2015.  
12  
13  
14 368 <http://www.who.int/mediacentre/factsheets/fs204/en/> (Accessed: 23<sup>rd</sup> July 2015).  
15  
16 369 2. Centers for Disease Control and Prevention (CDC). Immunization of Health-Care  
17  
18 370 Personnel: Recommendations of the Advisory Committee on Immunization Practices  
19  
20 371 (ACIP). *Morbidity and Mortality Weekly Report (MMWR): Recommendations and*  
21  
22 372 *Reports* 2011;60(RR07):1-45.  
23  
24 373 <http://www.cdc.gov/mmwr/preview/mmwrhtml/rr6007a1.htm> (Accessed: 12th July  
25  
26 374 2015).  
27  
28 375 3. Lavanchy D. Chronic Viral Hepatitis as a Public Health Issue in the World. *Best Practice*  
29  
30 376 *& Research Clinical Gastroenterology* 2008;22(6):991-1008.  
31  
32 377 4. Emechebe GO, Emodi IJ, Ikefuna AN, et al. Hepatitis B Virus Infection in Nigeria- A  
33  
34 378 Review. *Niger Med J* 2009;50:18-22.  
35  
36 379 5. Fekadu GA, Azage M. Hepatitis B Vaccine Knowledge and Vaccination Status among  
37  
38 380 Health Care Workers of Bahir Dar City Administration, Northwest Ethiopia: A Cross-  
39  
40 381 sectional Study. *BMC Infectious diseases* 2015;15:475-87.  
41  
42 382 6. Ogoina D, Pondei K, Adetunji B, et al. Prevalence of Hepatitis B Vaccination among  
43  
44 383 Health Care Workers in Nigeria in 2011-12. *Int J Occup Environ Med* 2014;5:51-56.  
45  
46 384 7. Occupational Safety and Health Administration (OSHA). Standard Interpretations. In:  
47  
48 385 Bloodborne Pathogens Standard. USA:OSHA 2004;29 CFR 1910.1030(f)(1).  
49  
50  
51  
52  
53  
54  
55  
56  
57  
58  
59  
60

- 1  
2  
3 386 [https://www.osha.gov/pls/oshaweb/owadisp.show\\_document?p\\_table=INTERPRETATI](https://www.osha.gov/pls/oshaweb/owadisp.show_document?p_table=INTERPRETATI)  
4  
5 387 [ONS&p\\_id=24010](#) (Accessed: 11 July 2015).  
6  
7  
8 388 8. Boal WL, Hales T, Ross CS. Blood-Borne Pathogens among Firefighters and Emergency  
9  
10 389 Medical Technicians. *Prehosp Emerg Care* 2005;9:236-47.  
11  
12 390 9. Rischitelli G, Harris J, McCauley L, et al. The Risk of Acquiring Hepatitis B or C among  
13  
14 391 Public Safety Workers- A Systematic Review. *Am J Prev Med* 2001;20:299-306.  
15  
16 392 10. Woodruff BA, Moyer LA, O'Rourke KM, Margolis HS. Blood Exposure and the Risk of  
17  
18 393 Hepatitis B Virus Infection in Firefighters. *J Occup Med* 1993;35:1048-54.  
19  
20 394 11. World Health Organization (WHO). Table 1: Summary of WHO Position Papers-  
21  
22 395 Recommendations for Routine Immunization. *Immunization, Vaccines and Biologicals*  
23  
24 396 2014. [http://www.who.int/immunization/policy/immunization\\_tables/en/](http://www.who.int/immunization/policy/immunization_tables/en/) (Accessed: 20  
25  
26 397 February 2015).  
27  
28 398 12. Centers for Disease Control and Prevention (CDC). Hepatitis B FAQs for Health  
29  
30 399 Professionals. *Viral Hepatitis – Hepatitis B Information* 2015.  
31  
32 400 <http://www.cdc.gov/hepatitis/hbv/hbvfaq.htm#treatment> (Accessed: 6<sup>th</sup> June 2015).  
33  
34 401 13. Ibekwe RC, Ibeziako N. Hepatitis B Vaccination Status among Health Workers in Enugu.  
35  
36 402 *Nigerian Journal of Clinical Practice* 2006;9:7-10.  
37  
38 403 14. Burnett RJ, Francois G, Mphahlele MJ, et al. Hepatitis B Vaccination Coverage in  
39  
40 404 Healthcare Workers in Gauteng Province, South Africa. *Vaccine* 2011;29:4293-97.  
41  
42 405 15. Chidoka O. The Lead Agency Concept: Federal Road Safety Corps, Nigeria Experience.  
43  
44 406 Paper presented at the African Road Safety Management Workshop; 2014; Freetown,  
45  
46 407 Sierra Leone.  
47  
48  
49  
50  
51  
52  
53  
54  
55  
56  
57  
58  
59  
60

- 1  
2  
3 408 <http://www.ssatp.org/sites/ssatp/files/pdfs/Events/2014/Presentation%20Nigeria.pdf>  
4  
5 409 (Accessed: 19 April 2015).  
6  
7  
8 410 16. Federal Road Safety Corps (FRSC). Official Website. *Federal Government of Nigeria*  
9  
10 411 2015. <http://frsc.gov.ng/> (Accessed: 22 February 2015).  
11  
12 412 17. Charan J, Biswas, T. How to Calculate Sample Size for Different Study Designs in  
13  
14 413 Medical Research? *Indian J Psychol Med* 2013;35:121-6.  
15  
16 414 18. Whitley E, Ball J. Statistics Review 4: Sample Size Calculations. *Crit Care* 2002;6:335-  
17  
18 415 41.  
19  
20 416 19. Hammer GP, Prel J-B, Blettner M. Avoiding Bias in Observational Studies. *Dtsch Arztebl*  
21  
22 417 *Int* 2009;106:664-8.  
23  
24 418 20. Al-Hussami M. Knowledge and Acceptance of Hepatitis B Vaccine. *The Internet Journal*  
25  
26 419 *of Healthcare Administration* 2001;2. <https://ispub.com/IJHCA/2/1/5725> (Accessed: 20th  
27  
28 420 April 2015).  
29  
30  
31 421 21. Bruce N, Pope D, Stanistreet D. Quantitative Methods for Health Research: A practical  
32  
33 422 Interactive Guide to Epidemiology and Statistics. Chichester,UK: Wiley 2008.  
34  
35 423 22. Azodo CC, Ehizele AO, Uche I, Erhabor P. Hepatitis-B Vaccination Status among Dental  
36  
37 424 Surgeons in Benin City, Nigeria. *Ann Med Health Sci Res* 2012;2:24-8.  
38  
39 425 23. Fatusi AO, Fatusi OA, Esimai AO, et al. Acceptance of Hepatitis B Vaccine by Workers  
40  
41 426 in a Nigerian Teaching Hospital. *East African Medical Journal* 2000;77:608-12.  
42  
43 427 24. Okwara EC, Enwere OO, Diwe CK, et al. Theatre and Laboratory Workers' Awareness  
44  
45 428 of and Safety Practices against Hepatitis B and C Infection in a Suburban University  
46  
47 429 Teaching Hospital in Nigeria. *Pan African Medical Journal* 2012;13.  
48  
49  
50  
51  
52  
53  
54  
55  
56  
57  
58  
59  
60

- 1  
2  
3 430 25. Paul N, Peterside O. Hepatitis B Vaccination Rate among Medical Students at the  
4  
5 431 University of Port Harcourt Teaching Hospital (UPTH). *World Journal of Vaccines*  
6  
7 432 2015;55:1-7. <http://dx.doi.org/10.4236/wjv.2015.51001> (Accessed: 22 June 2015).  
8  
9  
10 433 26. Adekanle O, Ndububa DA, Olowookere SA, et al. Knowledge of Hepatitis B Virus  
11  
12 434 Infection, Immunization with Hepatitis B Vaccine, Risk Perception, and Challenges to  
13  
14 435 Control Hepatitis among Hospital Workers in a Nigerian Tertiary Hospital. *Hepatitis*  
15  
16 436 *Research and Treatment* 2015;2015:1-6 [Online]. Available from:  
17  
18 437 <http://dx.doi.org/10.1155/2015/439867> (Accessed: 23<sup>rd</sup> May 2015).  
19  
20  
21 438 27. Adebamowo CA, Odukogbe AA, Ajuwon AJ. Knowledge, Attitude, and Practices  
22  
23 439 Related to Hepatitis B Virus Infection among Nigerian Obstetricians and Midwives. *J*  
24  
25 440 *Obstet Gynaecol* 1998;18:528-32.  
26  
27  
28 441 28. Lee DJ, Carrillo L, Fleming L. Epidemiology of Hepatitis B Vaccine Acceptance among  
29  
30 442 Urban Paramedics and Emergency Medical Technicians. *Am J Infect Control*  
31  
32 443 1997;25:421-3.  
33  
34  
35 444 29. Labinjo M, Juillard C, Kobusingye OC, Hyder AA. The Burden of Road Traffic Injuries  
36  
37 445 in Nigeria: Results of a Population-Based Survey. *Inj Prev* 2009;15:157-62.  
38  
39  
40 446 30. Occupational Safety and Health Administration (OSHA). Bloodborne Pathogens  
41  
42 447 Standard. USA:OSHA 2001;29 CFR 1910.1030.  
43  
44 448 [https://www.osha.gov/pls/oshaweb/owadisp.show\\_document?p\\_table=STANDARDS&p](https://www.osha.gov/pls/oshaweb/owadisp.show_document?p_table=STANDARDS&p_id=10051)  
45  
46 449 [\\_id=10051](https://www.osha.gov/pls/oshaweb/owadisp.show_document?p_table=STANDARDS&p_id=10051) (Accessed: 11<sup>th</sup> July 2015).  
47  
48  
49 450 31. Occupational Safety and Health Administration (OSHA). Hepatitis B Vaccination  
50  
51 451 Protection. In: OSHA Fact Sheet 2011.  
52  
53  
54  
55  
56  
57  
58  
59  
60

- 1  
2  
3 452 [https://www.osha.gov/OshDoc/data\\_BloodborneFacts/bbfact05.pdf](https://www.osha.gov/OshDoc/data_BloodborneFacts/bbfact05.pdf) (Accessed: 11th July  
4  
5 453 2015).  
6  
7  
8 454 32. Osazuwa-Peters N, Azodo CC, Ehizele AO, Obuekwe ON. Gender Differences in  
9  
10 455 Characteristics, Occupational Exposure, and Infection Control Practices among Dental  
11  
12 456 Professionals in Edo State, Nigeria. *South Afr J of Epidemiol Infect* 2012;27:61-5.  
13  
14 457 33. Adams A, Hall M, Fulghum J. Utilizing the Health Belief Model to Assess Vaccine  
15  
16 458 Acceptance of Patients on Hemodialysis. *Nephrol Nurs J* 2014;41:393-406.  
17  
18 459 34. Dube E, Gagnon D, MacDonald NE, the SAGE Working Group on Vaccine Hesitancy.  
19  
20 460 Strategies Intended to Address Vaccine Hesitancy: Review of Published Reviews.  
21  
22 461 *Vaccine* 2015;33:4191-203.  
23  
24  
25  
26 462 35. Carlson MDA, Morrison RS. Study Design, Precision, and Validity in Observational  
27  
28 463 Studies. *J Palliat Med* 2009;12:77-82.  
29  
30 464 36. Neugebauer R, Ng S. Differential Recall as a Source of Bias in Epidemiologic Research.  
31  
32 465 *J Clin Epidemiol* 1990;43:1337-41.  
33  
34  
35 466 37. Knottnerus JA, Tugwell P. Selection-Related Bias, An Ongoing Concern in Doing and  
36  
37 467 Publishing Research. *J Clin Epidemiol* 2014;67:1057-8.  
38  
39 468 [http://www.jclinepi.com/article/S0895-4356\(14\)00332-1/pdf](http://www.jclinepi.com/article/S0895-4356(14)00332-1/pdf) (Accessed: 15 September  
40  
41 469 2015).  
42  
43  
44 470 38. Kadam P, Bhalerao, S. Sample Size Calculation. *Int J Ayurveda Res* 2010;1:55-57.  
45  
46 471 39. World Health Organization (WHO). Hepatitis B Vaccines: WHO Position Paper *Weekly*  
47  
48 472 *Epidemiological Record* 2009;84:405-20.  
49  
50 473 <http://www.who.int.ezproxy.liv.ac.uk/wer/2009/wer8440.pdf> (Accessed: 20 June 2015).  
51  
52  
53 474  
54  
55  
56  
57  
58  
59  
60

1  
2  
3 475  
4  
5 476  
6  
7 477  
8  
9 478  
10  
11 479  
12  
13 480  
14  
15 481  
16  
17 482  
18  
19  
20  
21  
22  
23  
24  
25  
26  
27  
28  
29  
30  
31  
32  
33  
34  
35  
36  
37  
38  
39  
40  
41  
42  
43  
44  
45  
46  
47  
48  
49  
50  
51  
52  
53  
54  
55  
56  
57  
58  
59  
60

For peer review only

## APPENDIX A: ADAPTED STUDY QUESTIONNAIRE

## HEPATITIS B VACCINATION QUESTIONNAIRE

## For Official Use Only

Researcher.....

Questionnaire no: 

Date of Data Collection (DD/MM/YY).....

**IMPLIED CONSENT (Please read before completing questionnaire):** Having gone through the research information contained in the participant information sheet, by completing this questionnaire you are consenting to participate in the study. If you do not wish to complete the questionnaire, please put the blank version into the envelope and I will collect it with all other questionnaires.

Thank you.

**Please only complete the questionnaire if you are aged 18 years and above and have at least 6 months of service with FRSC**

**Note:** This questionnaire is anonymous; please do not write your name on it. Kindly give an answer to all the questions as it pertains to you and please answer as truthfully as you can.

Please check (✓) only the box that most correctly answers the question, making sure you make only one selection for each question except where otherwise indicated.

**Section A: Demographic Questions**

1. What is your sex?

Male

Female

2. What was your age on your last birthday?

- 18 to 29 years
- 30 to 39 years
- 40 to 49 years
- 50 years and above

### Section B: Employment History

3. How long have you worked with Federal Road Safety Corps (FRSC)?

- 6 months to 2 years
- 3 years to 10 years
- 11 years to 19 years
- 20 years and above

4. What is your cadre?

- Officer
- Marshal Inspectorate
- Road Marshal Assistant

5. Please check (✓) the box below your rank

| ACM | CC | DCC | ACC | CRC | SRC | RC | DRC | ARC |
|-----|----|-----|-----|-----|-----|----|-----|-----|
|     |    |     |     |     |     |    |     |     |

| CI | DCI | ACI | PMI | SMI | MI-I | MI-II | MI-III | CRMA | DCRMA | SRMA | RMAI | RMAII | RMAIII |
|----|-----|-----|-----|-----|------|-------|--------|------|-------|------|------|-------|--------|
|    |     |     |     |     |      |       |        |      |       |      |      |       |        |



### Section C: Perception of Risk of Exposure to Hepatitis B Virus

6. Have you ever heard about hepatitis B virus infection?

Yes

No

7. How serious do you think being infected with hepatitis B virus is compared to HIV?

Less serious than HIV

As serious as HIV

More serious than HIV

I don't know

8. How can someone be infected with hepatitis B virus? (please check (✓) all the correct boxes if your answer is more than one)

Through contact with blood of an infected person

Through contact with saliva of an infected person

Through contact with sweat of an infected person

Through contact with body fluid contaminated by blood of an infected person

I don't know

1  
2  
3 9. How much do you think your work with FRSC exposes you to the risk of  
4 contracting hepatitis B virus infection?  
5  
6

- 7  No risk of exposure  
8  
9  Low risk of exposure  
10  
11  Moderate risk of exposure  
12  
13  High risk of exposure  
14  
15  I don't know  
16  
17  
18

19  
20 **Section D: Hepatitis B vaccination Knowledge and Status**  
21

22 10. Have you ever heard about hepatitis B vaccination?  
23

- 24  Yes  
25  
26  No  
27  
28

29  
30 11. How effective do you think hepatitis B vaccination is in protecting someone  
31 against hepatitis B virus infection?  
32

- 33  Not effective  
34  
35  Slightly effective  
36  
37  Very effective  
38  
39  I don't know  
40  
41  
42

43  
44 12. Have you ever received hepatitis B vaccination?  
45

- 46  Yes  
47  
48  No  
49  
50

51 **If your answer to question 12 is 'No', answer question 13; if it is 'Yes', go to**  
52 **question 14**  
53  
54  
55  
56  
57  
58  
59  
60

1  
2  
3  
4  
5  
6  
7  
8  
9  
10  
11  
12  
13  
14  
15  
16  
17  
18  
19  
20  
21  
22  
23  
24  
25  
26  
27  
28  
29  
30  
31  
32  
33  
34  
35  
36  
37  
38  
39  
40  
41  
42  
43  
44  
45  
46  
47  
48  
49  
50  
51  
52  
53  
54  
55  
56  
57  
58  
59  
60

13. Why have you not received hepatitis B vaccination? (Please check (✓) all the correct boxes if your answer is more than one)

- I am not aware of hepatitis B vaccination
- I do not know where to go and receive it
- I don't have time
- It is expensive
- I don't see the need
- I am afraid of contracting the virus from the vaccine
- Others (please state).....

14. If your answer to question 12 is 'Yes', how many doses of hepatitis B vaccine have you received?

- 1 dose
- 2 doses
- 3 doses
- More than 3 doses

15. When did you receive the last dose of hepatitis B vaccine?

- Less than 1 month ago
- 1 month to 3 months ago
- 4 months to 6 months ago
- More than 6 months ago

1  
2  
3  
4  
5  
6  
7  
8  
9  
10  
11  
12  
13  
14  
15  
16  
17  
18  
19  
20  
21  
22  
23  
24  
25  
26  
27  
28  
29  
30  
31  
32  
33  
34  
35  
36  
37  
38  
39  
40  
41  
42  
43  
44  
45  
46  
47  
48  
49  
50  
51  
52  
53  
54  
55  
56  
57  
58  
59  
60

16. What do you think is the recommended full dose of hepatitis B vaccine?

- 1 dose
- 2 doses
- 3 or more doses
- I don't know

17. How long does a full dose of hepatitis B vaccine protect someone?

- Less than 1 year
- 1 year to 5 years
- 6 years to 10 years
- 11 years to 19 years
- 20 years or more
- I don't know

**Thank you for your time!**

## APPENDIX B: Knowledge Scoring Table

Scoring Table: HBV (A) and HBVc (B) Knowledge Questions and Scoring Pattern

| A. Question                                                                                                                          | Options checked                                                                 | Score             |
|--------------------------------------------------------------------------------------------------------------------------------------|---------------------------------------------------------------------------------|-------------------|
| Have you heard about hepatitis B virus infection? <b>(one option)</b>                                                                | Yes (✓)                                                                         | 1                 |
|                                                                                                                                      | No (✓)                                                                          | 0                 |
| How serious do you think being infected with hepatitis B virus is compared to HIV? <b>(one option)</b>                               | Less serious than HIV (✓)                                                       | 0                 |
|                                                                                                                                      | As serious as HIV (✓)                                                           | 0                 |
|                                                                                                                                      | More serious than HIV (✓)                                                       | 1                 |
|                                                                                                                                      | I don't know (✓)                                                                | 0                 |
| How can someone be infected with hepatitis B virus? (please check (✓) all the correct boxes if your answer is more than one)         | Through contact with blood of an infected person (✓)                            | 1                 |
|                                                                                                                                      | Through contact with saliva of an infected person <b>(blank)*</b>               | 1                 |
|                                                                                                                                      | Through contact with sweat of an infected person <b>(blank)*</b>                | 1                 |
|                                                                                                                                      | Through contact with body fluid contaminated by blood of an infected person (✓) | 1                 |
|                                                                                                                                      | I don't know (✓)                                                                | 0 for all options |
| Maximum HBV knowledge Score                                                                                                          |                                                                                 | 6 of 6            |
| Minimum HBV knowledge Score                                                                                                          |                                                                                 | 0 of 6            |
| B. Question                                                                                                                          | Options                                                                         | Score             |
| Have you ever heard about hepatitis B vaccination? <b>(one option)</b>                                                               | Yes (✓)                                                                         | 1                 |
|                                                                                                                                      | No (✓)                                                                          | 0                 |
| How effective do you think hepatitis B vaccination is in protecting someone against hepatitis B virus infection? <b>(one option)</b> | Not effective (✓)                                                               | 0                 |
|                                                                                                                                      | Slightly effective (✓)                                                          | 0                 |
|                                                                                                                                      | Very effective (✓)                                                              | 1                 |
|                                                                                                                                      | I don't know (✓)                                                                | 0                 |
| What do you think is the recommended full dose of hepatitis B vaccine? <b>(one option)</b>                                           | 1 dose (✓)                                                                      | 0                 |
|                                                                                                                                      | 2 doses (✓)                                                                     | 0                 |
|                                                                                                                                      | 3 or more doses (✓)                                                             | 1                 |
|                                                                                                                                      | I don't know (✓)                                                                | 0                 |
| How long does a full dose of hepatitis B vaccine protect                                                                             | Less than 1 year (✓)                                                            | 0                 |

| A. Question                  | Options checked          | Score  |
|------------------------------|--------------------------|--------|
| someone? (one option)        | 1 year to 5 years (✓)    | 0      |
|                              | 6 years to 10 years (✓)  | 0      |
|                              | 11 years to 19 years (✓) | 0      |
|                              | 20 years or more (✓)     | 1      |
|                              | I don't know (✓)         | 0      |
| Maximum HBVc knowledge score |                          | 4 of 4 |
| Minimum HBVc knowledge score |                          | 0 of 4 |

\* HBV can be found in saliva but the concentration is very low compared to blood; direct injection through bites is required to transmit the virus via this medium.<sup>1,2</sup> Transmission has not been observed through sweat.<sup>1</sup>

### References:

1. Canadian Center for Occupational Health and Safety (CCOHS). Hepatitis B. *OSH Facts Sheet* 2014. [http://www.ccohs.ca/oshanswers/diseases/hepatitis\\_b.html](http://www.ccohs.ca/oshanswers/diseases/hepatitis_b.html) (Accessed: 27th July 2015).
2. Centers for Disease Control and Prevention (CDC). When Someone Close to You has Viral Hepatitis. *Division of Viral Hepatitis* 2010. <http://www.cdc.gov/hepatitis/HBV/PDFs/HepBWhenSomeoneClose.pdf> (Accessed: 26th June 2015).

**Appendix C: Frequency of Available Data and Missing Data from Completed Questionnaires, Federal Road Safety Corps, Kaduna Sector Command, Nigeria, June-July, 2015**

| Variable                                     | Valid Sample Size | Available Data | Percentage | Missing Data | Percentage |
|----------------------------------------------|-------------------|----------------|------------|--------------|------------|
| Sex                                          | 341               | 327            | 95.9       | 14           | 4.1        |
| Age                                          | 341               | 338            | 99.1       | 3            | 0.9        |
| Duration of Service                          | 341               | 339            | 99.4       | 2            | 0.6        |
| Cadre                                        | 341               | 341            | 100        | 0            | 0          |
| Ever heard of HBV infection?                 | 341               | 340            | 99.7       | 1            | 0.3        |
| Seriousness of HBV compared to HIV           | 341               | 335            | 98.2       | 6            | 1.8        |
| Route of Transmission of HBV                 | 341               | 337            | 98.8       | 4            | 1.2        |
| Perception of Risk of exposure to HBV        | 341               | 340            | 99.7       | 1            | 0.3        |
| Ever heard of hepatitis B vaccination?       | 341               | 336            | 98.5       | 5            | 1.5        |
| Effectiveness of hepatitis B vaccination     | 341               | 334            | 97.9       | 7            | 2.1        |
| Ever received hepatitis B vaccination?       | 341               | 325            | 95.3       | 16           | 4.7        |
| Number of doses received                     | 198               | 198            | 100        | 0            | 0          |
| Recommended full dose of hepatitis B vaccine | 341               | 308            | 90.3       | 33           | 9.7        |
| Duration of protection from full-dose HBVc   | 341               | 312            | 91.5       | 29           | 8.5        |

**STROBE 2007 (v4) Statement—Checklist of items that should be included in reports of *cross-sectional studies***

| Section/Topic                | Item # | Recommendation                                                                                                                                                                       | Reported on page # |
|------------------------------|--------|--------------------------------------------------------------------------------------------------------------------------------------------------------------------------------------|--------------------|
| <b>Title and abstract</b>    | 1      | (a) Indicate the study’s design with a commonly used term in the title or the abstract                                                                                               | 1                  |
|                              |        | (b) Provide in the abstract an informative and balanced summary of what was done and what was found                                                                                  | 3,4                |
| <b>Introduction</b>          |        |                                                                                                                                                                                      |                    |
| Background/rationale         | 2      | Explain the scientific background and rationale for the investigation being reported                                                                                                 | 5,6                |
| Objectives                   | 3      | State specific objectives, including any prespecified hypotheses                                                                                                                     | 6                  |
| <b>Methods</b>               |        |                                                                                                                                                                                      |                    |
| Study design                 | 4      | Present key elements of study design early in the paper                                                                                                                              | 6                  |
| Setting                      | 5      | Describe the setting, locations, and relevant dates, including periods of recruitment, exposure, follow-up, and data collection                                                      | 6-8                |
| Participants                 | 6      | (a) Give the eligibility criteria, and the sources and methods of selection of participants                                                                                          | 8,9                |
| Variables                    | 7      | Clearly define all outcomes, exposures, predictors, potential confounders, and effect modifiers. Give diagnostic criteria, if applicable                                             | 10,11              |
| Data sources/<br>measurement | 8*     | For each variable of interest, give sources of data and details of methods of assessment (measurement). Describe comparability of assessment methods if there is more than one group | 9-11               |
| Bias                         | 9      | Describe any efforts to address potential sources of bias                                                                                                                            | 8-10               |
| Study size                   | 10     | Explain how the study size was arrived at                                                                                                                                            | 8                  |
| Quantitative variables       | 11     | Explain how quantitative variables were handled in the analyses. If applicable, describe which groupings were chosen and why                                                         | 10-12              |
| Statistical methods          | 12     | (a) Describe all statistical methods, including those used to control for confounding                                                                                                | 10-12              |
|                              |        | (b) Describe any methods used to examine subgroups and interactions                                                                                                                  | NA                 |
|                              |        | (c) Explain how missing data were addressed                                                                                                                                          | 12                 |
|                              |        | (d) If applicable, describe analytical methods taking account of sampling strategy                                                                                                   | 11,12              |
|                              |        | (e) Describe any sensitivity analyses                                                                                                                                                | NA                 |
| <b>Results</b>               |        |                                                                                                                                                                                      |                    |



|                          |     |                                                                                                                                                                                                              |       |
|--------------------------|-----|--------------------------------------------------------------------------------------------------------------------------------------------------------------------------------------------------------------|-------|
| Participants             | 13* | (a) Report numbers of individuals at each stage of study—eg numbers potentially eligible, examined for eligibility, confirmed eligible, included in the study, completing follow-up, and analysed            | 12-17 |
|                          |     | (b) Give reasons for non-participation at each stage                                                                                                                                                         | 12    |
|                          |     | (c) Consider use of a flow diagram                                                                                                                                                                           | NA    |
| Descriptive data         | 14* | (a) Give characteristics of study participants (eg demographic, clinical, social) and information on exposures and potential confounders                                                                     | 12,13 |
|                          |     | (b) Indicate number of participants with missing data for each variable of interest                                                                                                                          | 12    |
| Outcome data             | 15* | Report numbers of outcome events or summary measures                                                                                                                                                         | 15    |
| Main results             | 16  | (a) Give unadjusted estimates and, if applicable, confounder-adjusted estimates and their precision (eg, 95% confidence interval). Make clear which confounders were adjusted for and why they were included | 15-17 |
|                          |     | (b) Report category boundaries when continuous variables were categorized                                                                                                                                    | 10    |
|                          |     | (c) If relevant, consider translating estimates of relative risk into absolute risk for a meaningful time period                                                                                             | NA    |
| Other analyses           | 17  | Report other analyses done—eg analyses of subgroups and interactions, and sensitivity analyses                                                                                                               | NA    |
| <b>Discussion</b>        |     |                                                                                                                                                                                                              |       |
| Key results              | 18  | Summarise key results with reference to study objectives                                                                                                                                                     | 17,18 |
| Limitations              | 19  | Discuss limitations of the study, taking into account sources of potential bias or imprecision. Discuss both direction and magnitude of any potential bias                                                   | 21-23 |
| Interpretation           | 20  | Give a cautious overall interpretation of results considering objectives, limitations, multiplicity of analyses, results from similar studies, and other relevant evidence                                   | 18-21 |
| Generalisability         | 21  | Discuss the generalisability (external validity) of the study results                                                                                                                                        | 21,22 |
| <b>Other information</b> |     |                                                                                                                                                                                                              |       |
| Funding                  | 22  | Give the source of funding and the role of the funders for the present study and, if applicable, for the original study on which the present article is based                                                | 2     |

\*Give information separately for cases and controls in case-control studies and, if applicable, for exposed and unexposed groups in cohort and cross-sectional studies.

**Note:** An Explanation and Elaboration article discusses each checklist item and gives methodological background and published examples of transparent reporting. The STROBE checklist is best used in conjunction with this article (freely available on the Web sites of PLoS Medicine at <http://www.plosmedicine.org/>, Annals of Internal Medicine at <http://www.annals.org/>, and Epidemiology at <http://www.epidem.com/>). Information on the STROBE Initiative is available at [www.strobe-statement.org](http://www.strobe-statement.org).

# BMJ Open

## Hepatitis B Vaccination Coverage, Knowledge and Socio-Demographic Determinants of Uptake in High-Risk Public Safety Workers in Kaduna State, Nigeria: A Cross-Sectional Survey

|                                 |                                                                                                                 |
|---------------------------------|-----------------------------------------------------------------------------------------------------------------|
| Journal:                        | <i>BMJ Open</i>                                                                                                 |
| Manuscript ID                   | bmjopen-2017-015845.R1                                                                                          |
| Article Type:                   | Research                                                                                                        |
| Date Submitted by the Author:   | 23-Feb-2017                                                                                                     |
| Complete List of Authors:       | Ochu, Chinwe; Ahmadu Bello University Teaching Hospital, Family Medicine Beynon, Caryl; University of Liverpool |
| <b>Primary Subject Heading</b>: | Public health                                                                                                   |
| Secondary Subject Heading:      | Epidemiology, Occupational and environmental medicine, Infectious diseases                                      |
| Keywords:                       | Infection control < INFECTIOUS DISEASES, Hepatitis B virus, Vaccination coverage, Public safety workers         |
|                                 |                                                                                                                 |

SCHOLARONE™  
Manuscripts

1  
2  
3 **Hepatitis B Vaccination Coverage, Knowledge and Socio-Demographic Determinants of**  
4 **Uptake in High-Risk Public Safety Workers in Kaduna State, Nigeria: A Cross-Sectional**  
5 **Survey**  
6  
7  
8  
9

10 **Corresponding Author:** Ochu, Chinwe Lucia

11 **Department:** Family Medicine

12 **Institution:** Ahmadu Bello University Teaching Hospital

13 **City:** Zaria

14 **State:** Kaduna State

15 **Postal code:** 810105

16 **Country:** Nigeria

17 **Emails:** [lucia.ochu@online.liverpool.ac.uk](mailto:lucia.ochu@online.liverpool.ac.uk); [luciaocho@yahoo.com](mailto:luciaocho@yahoo.com)

18 **Phone:** +2348027413202

19  
20  
21 **Co-Author:** Beynon, Caryl M.

22 **Department:** Public Health

23 **Institution:** University of Liverpool (online)

24 **Country:** United Kingdom

25 **Email:** [caryl.beynon@online.liverpool.ac.uk](mailto:caryl.beynon@online.liverpool.ac.uk)

26 **Phone:** NA

27  
28  
29  
30  
31  
32 **Word Counts:** Abstract: 290; Main text: 4000 (excluding title page, statements, abstract, article  
33 summary, tables, acknowledgment and references).

34 **Number of tables:** 5

35 **Number of references:** 38

36 **Number of supplementary files (appendices) for online only publication:** 3  
37  
38  
39  
40  
41  
42  
43  
44  
45  
46  
47  
48  
49  
50  
51  
52  
53  
54  
55  
56  
57  
58  
59  
60

## STATEMENTS

**Contributorship:** This study was carried out as a dissertation research by CLO under the close supervision of CMB, in partial fulfillment of the requirement for the award of the degree of Master of Public Health by the University of Liverpool, United Kingdom. CLO collected the data and conducted the analyses. These were reviewed by CMB. The manuscript was drafted by CLO and reviewed and revised by CMB. Both authors approved the final version for publication.

**Competing Interests:** None declared.

**Funding:** This research received no specific grant from any funding agency in the public, commercial or not-for-profit sectors.

**Ethics Approval:** This study was approved by the University of Liverpool's Ethics Committee and the Ethics Committee of Kaduna State Ministry of Health.

**Participant Consent:** Obtained

**Data sharing:** Extra data can be accessed via the Dryad data repository at <http://datadryad.org/> with the doi:10.5061/dryad.545q0

## 1 ABSTRACT

2 **Objectives:** To estimate hepatitis B vaccination (HBVc) coverage, and knowledge and socio-  
3 demographic determinants of full-dose uptake in Federal Road Safety Corps (FRSC) members,  
4 Kaduna State, Nigeria in order to inform relevant targeted vaccination policies.

5 **Design:** A cross-sectional survey of FRSC members, Kaduna Sector Command.

6 **Settings:** Six randomly-selected Unit Commands under Kaduna Sector Command, Kaduna State,  
7 Nigeria.

8 **Participants:** Pilot-tested structured self-administered questionnaire was administered to 341  
9 participants aged 18 years and above with  $\geq 6$  months of service between 17<sup>th</sup> June and 22<sup>nd</sup> July,  
10 2015. Excluded were FRSC members in Road Safety (RS) 1 Zonal Command headquarters as  
11 the Zonal Command includes other States beyond the study scope.

12 **Primary Outcome:** HBVc status of participants categorized as 'not vaccinated' for uptake of <3  
13 doses and 'vaccinated' for uptake of  $\geq 3$  doses.

14 **Analysis:** Descriptive analysis estimated HBVc coverage while logistic regression ascertained  
15 associations.

16 **Results:** Most participants were males, aged 30-39 years, with 3-10 years of service, and of  
17 Marshal cadre. HBVc coverage was 60.9% for  $\geq 1$  dose and 30.5% for  $\geq 3$  doses. Less than 47%  
18 of participants scored above the mean knowledge score for hepatitis B virus (HBV) and HBVc.  
19 Female sex (AOR 2.28, 95% CI 1.15-4.52,  $p < 0.05$ ), perceiving there to be an occupational risk  
20 of exposure to HBV (AOR 2.86, 95% CI 1.06-7.70,  $p < 0.001$ ), and increasing HBVc knowledge  
21 (AOR 2.68, 95% CI 1.83-3.92,  $p < 0.001$ ) were independent predictors of full-dose HBVc in  
22 FRSC members, Kaduna Sector Command.

1  
2  
3  
4 23 **Conclusions:** HBVc coverage and knowledge are poor among FRSC members, Kaduna Sector  
5  
6 24 Command. Educational intervention, geared towards improving FRSC members' knowledge of  
7  
8 25 HBVc and perception of risk of occupational exposure to HBV, is recommended for these  
9  
10 26 vulnerable public safety workers. Such enlightenment could be a cheap and easy way of  
11  
12 27 improving HBVc coverage in the study population.

13  
14  
15 28 **Keywords:** infection control; hepatitis B virus; vaccination coverage; public safety workers  
16

## 17 18 29 **ARTICLE SUMMARY**

### 19 20 30 **Strengths and Limitations of this Study**

- 21  
22  
23 31 • This is the first study to estimate hepatitis B vaccination coverage of public safety  
24  
25 32 workers such as the Federal Road Safety Corps in Nigeria despite these workers being  
26  
27 33 occupationally exposed to hepatitis B virus.
- 28  
29 34 • The participating Unit Commands were randomly selected and the study had a high  
30  
31 35 response rate hence minimizing selection bias and improving the generalizability of the  
32  
33 36 research findings.
- 34  
35 37 • Retrospective studies are prone to recall bias; this was mitigated in this study by omitting  
36  
37 38 inconsistent data suggestive of guessing at the analysis stage.
- 38  
39 39 • Researcher bias was mitigated by the use of a pre-validated data collection instrument  
40  
41 40 and by pre-determining analytical strategies before data collection while confounding  
42  
43 41 was minimized through multivariate analysis.
- 44  
45 42 • Missing data made sample size in multivariate analysis less than the pre-research  
46  
47 43 estimate, though the proportion analyzed constituted a good representation of the entire  
48  
49 44 study population.
- 50  
51  
52  
53  
54  
55  
56  
57  
58 45

## 46 INTRODUCTION

47 Hepatitis B virus (HBV) is a highly infectious blood-borne pathogen usually transmitted via  
48 percutaneous or mucosal exposure to infected blood and body fluids.[1] HBV infection affects  
49 about one third of the world's population with >350 million persons being chronic carriers.[2,3]  
50 Sub-Saharan Africa and Southeast Asia have the highest prevalence of about 10-20% for chronic  
51 HBV.[2] HBV infection has heterogeneous outcomes: acute viral hepatitis, spontaneous  
52 clearance, or chronicity with its common fatal sequelae of hepatic cirrhosis and hepatocellular  
53 carcinoma (HCC).[3,4] Most adult-onset infections resolve spontaneously with only 5-10%  
54 resulting in chronic carriage.[2] Chronicity is commonly associated with early childhood  
55 exposures with an estimated 90% of perinatal transmissions becoming chronic infections.[4]  
56 Perinatal and horizontal transmissions are the predominant routes of HBV infection in  
57 hyperendemic settings.[5]

58 Hepatitis B vaccination (HBVc) is the most effective way of controlling HBV infection.[6] HBV  
59 control in sub-Saharan Africa targets mother-to-child transmissions via HBVc of children 0-5  
60 years.[2,7] Though chronicity has been the major HBV outcome of public health interest, recent  
61 subtle transitions in the global mortality burden of HBV outcomes however demands  
62 readjustment of this focus. In a comparative systematic analysis of global disease burden,  
63 Lozano et al. demonstrated the trend in HBV-related outcomes between 1990 and 2010.[8]  
64 Though HBV-related HCC caused more deaths than acute HBV infection, the percentage  
65 increase in age-standardized death rates was about eleven times higher for acute HBV infection  
66 (29.2%) than for HBV-related HCC (2.6%) while death from HBV-related liver cirrhosis  
67 declined by 18.5%.[8] This growing mortality trend for acute HBV infection demands a renewed  
68 public health action in addressing this often neglected outcome of HBV. Prevention strategies for

1  
2  
3  
4 69 HBV should also target those at high risk of acute infections. Public safety workers (PSWs) such  
5  
6 70 as fire-fighters, correctional officers, rescue workers and emergency medical service providers  
7  
8 71 with regular exposure to blood or body fluids, have similar risks as hospital-based healthcare  
9  
10 72 workers (HCWs) of contracting HBV.[9] Besides, HCWs or PSWs, in the course of their duties,  
11  
12 73 can infect children who consequently become chronic carriers. Controlling HBV infection in  
13  
14 74 HCWs and PSWs is therefore of public health relevance. World Health Organization (WHO)  
15  
16 75 prescribes universal HBVc of HCWs and PSWs with frequent blood-skin exposure.[10] A  
17  
18 76 standard three-dose vaccine regimen, with the second and third doses given one month and six  
19  
20 77 months apart from the initial dose respectively, is very effective in conferring immunity against  
21  
22 78 HBV for  $\geq 20$  years.[1,11]

23  
24  
25  
26  
27  
28 79 Nigeria is hyperendemic for HBV; Schweitzer et al. reported a pooled HBV prevalence estimate  
29  
30 80 of 9.76% (95% confidence interval (CI) 9.59-9.93).[5] This hyperendemic status poses a great  
31  
32 81 risk of occupational exposure to HBV for HCWs and PSWs with regular blood-skin contact,  
33  
34 82 though this risk has not been estimated in any Nigerian study. The risk of transmission from  
35  
36 83 infected blood is said to be 100 times more for HBV than for HIV in non-immune  
37  
38 84 individuals.[11] HBVc became part of the Nigerian National Programme on Immunization for  
39  
40 85 children 0-5 years in 2004.[12] Sub-optimal immunization coverage is however still a huge  
41  
42 86 problem, especially in northern Nigeria.[12,13] To effectively control HBV in the Nigerian  
43  
44 87 setting would therefore require plurality of approaches. Prevention of new infections in at-risk  
45  
46 88 adults should complement prevention of perinatal transmissions. There is currently no universal  
47  
48 89 HBVc programme for high-risk adults in Nigeria. Such adults, however, can access HBVc  
49  
50 90 individually in primary healthcare centres at subsidized rates.  
51  
52  
53  
54  
55  
56  
57  
58  
59  
60



1  
2  
3 91 The Federal Road Safety Corps (FRSC) was established by the Federal Government of Nigeria  
4  
5 92 in 1988 due to the high rate of road traffic crashes (RTCs) in the country.[14] Road safety  
6  
7  
8 93 functions of FRSC include rescue and emergency care of RTC victims and this brings them in  
9  
10 94 regular contact with blood.[14] All FRSC members participate in rescue operations, though this  
11  
12 95 is more frequent for the Marshal cadre. Crashed vehicles with broken glasses increase the risk of  
13  
14 96 sharps injuries for these PSWs. This exposes them and the accident victims they rescue to a high  
15  
16 97 risk of HBV infection in this hyperendemic setting. No study exists on HBVc coverage of PSWs  
17  
18 98 in Nigeria. The objectives of this study were to estimate HBVc coverage, and knowledge and  
19  
20 99 socio-demographic determinants of full-dose uptake in FRSC members, Kaduna State, Nigeria,  
21  
22 100 in order to inform relevant targeted vaccination policies.  
23  
24  
25  
26  
27

## 28 101 **METHODS**

29  
30  
31 102 **Study Design:** A quantitative cross-sectional survey of FRSC members, Kaduna Sector  
32  
33 103 Command (KSC), Nigeria.  
34  
35

36 104 **Setting and Target Population:** Kaduna State is the third most populous State in Nigeria and  
37  
38 105 has 3 senatorial zones with 23 local government areas (LGAs).  
39  
40  
41

42 106 The FRSC is divided into 12 Zonal Commands; each Zonal Command has Sector Commands  
43  
44 107 which are sub-divided into Unit Commands (UCs).[15] There are currently 204 UCs in  
45  
46 108 Nigeria.[15] The first 11 UCs are located in the KSC with the KSC headquarters making them  
47  
48 109 12; these cover the entire 23 LGAs in Kaduna State (Table 1).  
49  
50  
51

52 110

53 111

54 112

113 **Table 1: Location, Coverage and Staff Distribution of Unit Commands (UCs) of FRSC, Kaduna**  
 114 **Sector Command, Nigeria, June-July, 2015.**

| Commands                                 | Designation  | Staff Strength |            |            | Number of LGAs Covered | Location (LGA) |
|------------------------------------------|--------------|----------------|------------|------------|------------------------|----------------|
|                                          |              | Cadre          |            |            |                        |                |
|                                          |              | Officer        | Marshal    | Total      |                        |                |
| Kaduna Sector Command (KSC) Headquarters | *RS1.1       | 46             | 118        | 164        | 2                      | Kaduna North   |
| Kafanchan UC                             | RS1.11       | 15             | 44         | 59         | 4                      | Jama'a         |
| Birnin Gwari UC                          | RS1.12       | 17             | 35         | 52         | 1                      | Birnin Gwari   |
| Zaria UC                                 | RS1.13       | 24             | 66         | 90         | 5                      | Sabon Gari     |
| Saminaka UC                              | RS1.14       | 10             | 36         | 46         | 1                      | Lere           |
| Sabon Tasha UC                           | RS1.15       | 16             | 52         | 68         | 1                      | Chikun         |
| Kakau UC                                 | RS1.16       | 18             | 66         | 84         | 2                      | Chikun         |
| Birnin Yero UC                           | RS1.17       | 15             | 44         | 59         | 1                      | Igabi          |
| Gwantu UC                                | RS1.18       | 8              | 31         | 39         | 2                      | Sanga          |
| Katari UC                                | RS1.19       | 19             | 37         | 56         | 1                      | Kachia         |
| Kachia UC                                | RS1.110      | 10             | 26         | 36         | 2                      | Kachia         |
| Tashan Yari UC                           | RS1.111      | 10             | 26         | 36         | 1                      | Makarfi        |
|                                          | <b>Total</b> | <b>208</b>     | <b>580</b> | <b>789</b> | <b>23</b>              |                |

\*RS: Road Safety

116 KSC is one of the four Sector Commands that make up the RS1 Zonal Command whose  
 117 headquarters is in Kaduna. Two major cadres exist in FRSC: Officer and Marshal, though the  
 118 latter is sub-divided into Marshal Inspectorate and Road Marshal Assistant. At the time of this  
 119 study, there were 789 FRSC members in KSC, 26% of which were officers and 74% Marshals.  
 120 The study was conducted in six randomly selected UCs: KSC headquarters, Saminaka, Kakau,  
 121 Gwantu, Katari, and Kachia.

1  
2  
3 122 **Inclusion and Exclusion Criteria:** Only FRSC members in KSC aged  $\geq 18$  years with  $\geq 6$   
4  
5 123 months of service were included in the study. This ensured that only adults long enough in  
6  
7 124 service to be made aware of the risk of HBV were surveyed. FRSC members in RS1 Zonal  
8  
9 125 Command headquarters were excluded from the study as the Zonal Command includes other  
10  
11 126 States beyond the study scope.

12  
13  
14  
15  
16 127 **Sample Size:** This was estimated using the formula for cross-sectional surveys:  $n = 1.96^2 \times p(1-$   
17  
18 128  $p)/d^2$ , where  $n$  is the required sample size,  $p$  is prevalence estimate of HBVc in previous studies,  
19  
20 129 and  $d$  is precision or acceptable error margin (5%).[16] Ogoina et al.'s prevalence estimate of  
21  
22 130 36.2% in a survey of 290 HCWs in Nigeria[17] was used as proxy since there is no existing  
23  
24 131 study on PSWs in Nigeria. Anticipating a lower prevalence rate among non-HCWs with  
25  
26 132 expectedly lower level of awareness of HBVc, 30% prevalence was assumed. ( $N = 1.96^2 \times 0.3(1-$   
27  
28 133  $0.3)/0.5^2 = 323$ ). Using 24% as anticipated non-response rate ( $q$ ),[17] a final sample size of 425  
29  
30 134 was estimated using the formula:  $N_f = N_s/1-q$ , where  $N_f$  is the final sample size and  $N_s$  the initial  
31  
32 135 sample size.[18]

33  
34  
35  
36  
37  
38 136 **Sampling:** The sampling frame was a list of the 12 UCs from the KSC headquarters. Each UC  
39  
40 137 was considered a cluster. Clusters were randomly selected using a computer-generated set of  
41  
42 138 random numbers until sample size was achieved. This simple random selection of clusters was to  
43  
44 139 ensure representativeness of selected UCs.[19] Six UCs were selected for the study. All FRSC  
45  
46 140 members in the selected UCs were targeted for questionnaire distribution.

47  
48  
49  
50  
51 141 **Data Collection:** UCs of FRSC have compulsory weekly meetings. Permission was obtained for  
52  
53 142 data collection at these meetings. The UCs were informed of the research prior to visits. Data  
54  
55 143 were collected between 17<sup>th</sup> June and 22<sup>nd</sup> July, 2015. Participant information sheet (PIS) was  
56  
57  
58  
59  
60

1  
2  
3 144 reviewed with the staff with emphasis on voluntary participation, anonymity and confidentiality  
4  
5 145 of collected data. Inclusion criteria and implied consent were further explained; completion of  
6  
7  
8 146 questionnaire was considered consent to participate. Participants were asked to seal completed  
9  
10  
11 147 questionnaires in the given envelopes and drop them in a common collection box provided by the  
12  
13 148 researcher. This was to ensure anonymity. Those unwilling to participate were asked to drop the  
14  
15 149 sealed uncompleted questionnaires in the box alongside participants. Non-respondents were  
16  
17  
18 150 therefore not identified during data collection. Two UCs (KSC Headquarters & Kakau) were re-  
19  
20 151 visited in subsequent meetings due to poor initial attendance. Routine attendance lists taken by  
21  
22 152 the UCs at the initial meetings were used to prevent re-participation of previous participants.

23  
24  
25 153 **Instruments:** Due to paucity of studies on the research topic, accessing a pre-validated  
26  
27  
28 154 questionnaire for the study was difficult. After an extensive literature search, only Al-Hussami's  
29  
30 155 "Hepatitis B Vaccine Knowledge and Acceptance" questionnaire could be found.[20] This  
31  
32  
33 156 questionnaire has been used for HCWs in United States. It was validated in two pilot studies with  
34  
35 157 testing for inter-reliability but the test statistic was not reported.[20] There were 44 multiple  
36  
37 158 choice questions including some open-ended ones. A structured anonymous self-administered  
38  
39  
40 159 questionnaire was adapted from this questionnaire for the present study (appendix A). Only  
41  
42 160 questions relevant to the research questions were selected. Questions were simplified to suit the  
43  
44 161 literacy status of the study population. The adapted study questionnaire contained 17 questions  
45  
46 162 that elicited information on demographics (sex, age, duration of service, cadre and rank), HBV  
47  
48 163 knowledge and perception of risk of exposure, and HBVc knowledge and status. Though rank  
49  
50  
51 164 was obtained, this was not included in analysis since it mirrors cadre. The questionnaire was  
52  
53  
54 165 pilot-tested on FRSC members in RS1 Zonal Command headquarters.

55  
56  
57 166 **Statistical Analysis:** Table 2 describes the variables in the study.  
58  
59  
60

Table 2: Description of Variables in the Study, FRSC, KSC, Nigeria, June-July, 2015.

| Variable              | Description                                                                                                                                                                                                                                                                                                                                                                                             | Type of Data    |
|-----------------------|---------------------------------------------------------------------------------------------------------------------------------------------------------------------------------------------------------------------------------------------------------------------------------------------------------------------------------------------------------------------------------------------------------|-----------------|
| Independent Variables |                                                                                                                                                                                                                                                                                                                                                                                                         |                 |
| Sex                   | This was the gender of study participants categorized as either male or female                                                                                                                                                                                                                                                                                                                          | Nominal         |
| Age                   | This variable ascertained the age of participants on their last birthday. It was categorized to enhance anonymity from 18 years which is the age definition of commencement of adulthood to $\geq 50$ years which marks the age before retirement from Nigerian Civil Service at 60 years. The categories included: 18-29 years; 30-39 years; 40-49 years; $\geq 50$ years                              | Ordinal         |
| Duration of Service   | This variable elicited how long a respondent had been in service with the Federal Road Safety Corps. It was categorized into: 6 months-2 years (probation period in civil service); 3- 10 years; 11 years to 19 years; and $\geq 20$ years (close to retirement by service year at 35 years).                                                                                                           | Ordinal         |
| Cadre                 | This ascertained the official class of participant based on position and seniority in office. There were two major categories: Officers and Marshals with the latter sub-categorized into Marshal Inspectorate and Field Marshal Assistant in a descending order. It also signified educational qualification order with the least educated being the Field Marshal Assistant.                          | Nominal/Ordinal |
| Risk Perception       | This ascertained the level of perception of occupational risk of exposure to HBV by respondents. It was initially categorized into: No risk of exposure, low risk of exposure, moderate risk of exposure, high risk of exposure, and I don't know. This was later dichotomized for further analysis by merging the 'I don't know' group with the 'no risk' group to form a 'no risk perceived' category | Nominal/Ordinal |

Table 2: Description of Variables in the Study, FRSC, KSC, Nigeria, June-July, 2015.

| Variable                                       | Description                                                                                                                                                                                                                                                                                                                                                                                                                                                        | Type of Data |
|------------------------------------------------|--------------------------------------------------------------------------------------------------------------------------------------------------------------------------------------------------------------------------------------------------------------------------------------------------------------------------------------------------------------------------------------------------------------------------------------------------------------------|--------------|
|                                                | with the rest forming the 'risk perceived' category.                                                                                                                                                                                                                                                                                                                                                                                                               |              |
| Hepatitis B Virus (HBV) Knowledge Score        | This variable sought to estimate the level of knowledge of basic information on HBV. It includes questions on HBV awareness, seriousness compared to HIV, and route of transmission. For each participant, the number of questions answered correctly was noted as the score (see scoring table in appendix B).                                                                                                                                                    | Continuous   |
| Hepatitis B Vaccination (HBVc) Knowledge Score | This measured the level of basic knowledge of HBVc among participants. It comprised questions on HBVc awareness, effectiveness, recommended full dosage and duration of protection from full-dose vaccination. For each participant, the number of questions answered correctly was noted as the score (appendix B).                                                                                                                                               | Continuous   |
| Dependent Variable                             |                                                                                                                                                                                                                                                                                                                                                                                                                                                                    |              |
| HBVc Status                                    | Information was elicited on whether participant had ever received HBVc and the number of doses received. Descriptive analysis was done using these data. Dichotomization of data was also done for logistic regression analysis. Since only those with $\geq 3$ doses of HBVc uptake are considered fully protected,[11] those with $\geq 3$ doses were labeled 'vaccinated' and the rest 'not vaccinated'. This was noted as the HBVc status of each participant. | Nominal      |

167

168 All analyses were conducted using SPSS version 21. Descriptive analysis ascertained frequencies  
 169 and distributions of data. Histograms showed both HBV knowledge and HBVc knowledge  
 170 scores to be normally distributed, hence their mean and standard deviations (SD) were calculated

1  
2  
3 171 as was the percentage of participants scoring above the mean scores. Since the outcome variable  
4  
5 172 (HBVc status) was binary, logistic regression analysis was used in testing for associations with  
6  
7  
8 173 the independent variables (table 2).[21] To mitigate confounding, univariate analyses were first  
9  
10 174 carried out and the variables identified as significantly associated ( $p < 0.05$ ) with HBVc status  
11  
12 175 were included in the multivariate analysis for independent predictors of full-dose HBVc.[21]  
13  
14  
15 176 Adjusted odds ratios (AOR) with 95% CI for each variable was computed and significance level  
16  
17 177 set at  $p < 0.05$ . Missing data on each variable were excluded in the analysis of the variable.  
18  
19

## 20 21 178 **RESULTS**

22  
23  
24 179 There were 354 questionnaires distributed in the six UCs sampled from FRSC, KSC. Six  
25  
26 180 questionnaires were discarded for having missing data on up to 3 of the independent variables or  
27  
28 181 on the dependent variable and  $\geq 2$  independent variables. Seven questionnaires were submitted  
29  
30 182 blank. In all, 341 completed questionnaires were included for analysis, giving a response rate of  
31  
32 183 96.3%. Appendix C shows percentage of missing data for each of the 14 questions analyzed.  
33  
34  
35 184 Missing data were most frequent on the question on recommended dose of vaccine (9.7%;  
36  
37 185 33/341) followed by that on the duration of protection from full-dose HBVc (8.5%; 29/341). All  
38  
39 186 participants provided data on cadre. Most respondents were males; aged 30-39 years; had worked  
40  
41 187 between 3-10 years with FRSC; and were of Marshal Cadre (table 3).  
42  
43  
44  
45  
46 188  
47  
48  
49 189  
50  
51  
52 190  
53  
54  
55  
56 191  
57  
58  
59  
60

Table 3: Socio-Demographic Characteristics of Study Sample of FRSC Members, KSC, Nigeria, June-July, 2015.

| Variable                    | Frequency | Percentage |
|-----------------------------|-----------|------------|
| Sex (n=327)                 |           |            |
| Male                        | 260       | 79.5       |
| Female                      | 67        | 20.5       |
| Age (n=338)                 |           |            |
| 18-29 years                 | 64        | 18.9       |
| 30-39 years                 | 167       | 49.4       |
| 40-49 years                 | 87        | 25.7       |
| ≥50 years                   | 20        | 5.9        |
| Duration of Service (n=339) |           |            |
| 6 months-2 years            | 36        | 10.6       |
| 3-10 years                  | 188       | 55.5       |
| 11-19 years                 | 87        | 25.7       |
| ≥20 years                   | 28        | 8.3        |
| Cadre (n=341)               |           |            |
| Officer                     | 96        | 28.2       |
| Marshal                     | 245       | 71.8       |
| -Marshal Inspectorate       | 111       | 32.6       |
| - Field Marshal Assistant   | 134       | 39.3       |

192

193 **HBV Knowledge:** The mean total number of correct answers to HBV knowledge questions was  
 194 3.0 out of 6.0 (SD 1.5). Only 46% (157/341) of participants scored above the mean. The  
 195 proportion of correct answers to HBV knowledge questions ranged from 2.1% (7/337) on route  
 196 of transmission of HBV to 93.2% (317/340) on having ever heard of HBV. Approximately  
 197 22.6% (76/337) of respondents answered 'I don't know' to the question pertaining to the route of  
 198 transmission of HBV and this response was the most frequent. Merely 2.1% (7/337) correctly  
 199 identified contact with infected blood and blood-contaminated body fluid as routes of  
 200 transmission of HBV. Only 4 participants (1.2%; n=341) answered all 6 HBV knowledge



1  
2  
3 201 questions correctly while 16 (4.7%, n=341) answered none correctly. HBV infection was  
4  
5 202 perceived as more serious than HIV by most respondents (56.7%; 190/335) while about 3.0%  
6  
7  
8 203 (10/335) felt it was less serious than HIV. While 20.6% (69/335) claimed no knowledge of the  
9  
10 204 seriousness of HBV compared to HIV, 19.7% (66/335) ascribed equal severity to the two.

11  
12  
13 205 **HBVc Knowledge:** The mean number of correct answers to HBVc questions was 2.0 out of 4.0  
14  
15 206 (SD 1.1). Approximately 42.2% (144/341) of participants had scores higher than the mean score.  
16  
17 207 All four questions on HBVc were answered correctly by only 4.1% (14/341) of participants  
18  
19 208 while no correct answer was given by 11.7% (40/341). Rate of correctness ranged from 6.1%  
20  
21 209 (19/312) on question on duration of protection from full-dose HBVc to 86.6% (291/336) on  
22  
23 210 having ever heard of HBVc. Most respondents (62.9%; 210/334) described HBVc as very  
24  
25 211 effective. While 6.9% (23/334) rated it slightly effective, 2.7% (9/334) felt it was not effective at  
26  
27 212 all and 27.5% (92/334) indicated not knowing its effectiveness. Roughly 54.9% (169/308) of  
28  
29 213 respondents correctly identified recommended full HBVc dose as  $\geq 3$  doses while 1.6% (5/308)  
30  
31 214 and 3.9% (12/308) thought it was 1 dose and 2 doses respectively. Up to 39.6% (122/308)  
32  
33 215 indicated not knowing the recommended full dose of HBVc.

34  
35  
36  
37  
38  
39  
40 216 **Perception of Risk of Occupational Exposure to HBV:** While most respondents (55.3%;  
41  
42 217 188/340) rated themselves at high risk of occupational exposure to HBV, 22.4% (76/340) did not  
43  
44 218 know their risk status. Whereas 5.3% (18/340) of respondents considered themselves at no risk  
45  
46 219 of exposure to HBV, 5.9% (20/340) and 11.2% (38/340) rated themselves at low and moderate  
47  
48 220 risks of exposure respectively. After dichotomizing this variable into 'no risk perceived' and  
49  
50 221 'risk perceived' categories, 72.4% (246/340) had some level of risk perception while 27.6%  
51  
52 222 (94/340) had no risk perception for HBV.  
53  
54  
55  
56  
57  
58  
59  
60

1  
2  
3 223 **HBVc Coverage:** Of the 341 participants, 6 did not provide data on their HBVc status. Ten  
4  
5  
6 224 others answered 'yes' to having ever received HBVc but omitted the number of doses received  
7  
8 225 and were therefore inputted as missing data. Only 325 respondents (95.3%) were included in the  
9  
10 226 sub-analysis. Roughly 60.9% (198/325) of the respondents affirmed having ever received  $\geq 1$   
11  
12 227 dose of HBVc and 50.0% of these (99/198) had received  $\geq 3$  doses resulting in full-dose coverage  
13  
14  
15 228 of 30.5% (99/325) among the respondents. Approximately 39.1% (127/325) of respondents had  
16  
17 229 never received HBVc. Together with the 99 participants with  $< 3$  doses, 69.5% (226/325) were  
18  
19 230 classified 'not vaccinated' while 30.5% (99/325) were labeled 'vaccinated'.  
20  
21

22  
23 231 **Logistic Regression Analyses:** All the variables were significantly associated with HBVc on  
24  
25 232 univariate analyses (table 4) and were included in the multivariate analysis for independent  
26  
27 233 predictors of full-dose HBVc uptake (table 5). Being female was associated with about twice the  
28  
29 234 likelihood of having received full-dose HBVc (table 5). When risk perception was analyzed as a  
30  
31 235 dichotomous variable ('no risk perceived' versus 'risk perceived'), those with any level of risk  
32  
33 236 perception for occupational exposure to HBV were about 3 times more likely to have received  
34  
35 237 full-dose HBVc than those without risk perception for HBV (table 5). Though the odds of being  
36  
37 238 fully vaccinated increased with duration of service, this was not statistically significant. While  
38  
39 239 HBV knowledge was not a significant predictor of full-dose HBVc, knowledge of HBVc was  
40  
41 240 significantly associated with full-dose HBVc with each unit increase in number of correct  
42  
43 241 answers being associated with up to three times increased likelihood of being fully vaccinated  
44  
45 242 (table 5).  
46  
47  
48  
49  
50

51  
52 243  
53  
54  
55  
56 244  
57  
58  
59  
60

**Table 4: Univariate Binary Logistic Regression Analyses Showing Unadjusted Odds Ratios of the Association between Independent Variables and Full-Dose Hepatitis B Vaccination Uptake among FRSC Members, KSC, Nigeria, June-July, 2015**

| Independent Variable                             | Sample Size | Odds Ratio | 95% CI (p-value)    |
|--------------------------------------------------|-------------|------------|---------------------|
| Sex                                              | 313         |            |                     |
| Male                                             |             | 1          |                     |
| Female                                           |             | 2.66       | 1.51-4.70 (0.001)   |
| Age                                              | 323         |            |                     |
| 18-29 years                                      |             | 1          |                     |
| 30-39 years                                      |             | 2.08       | 0.97-4.44 (0.059)   |
| 40-49 years                                      |             | 3.30       | 1.47-7.40 (0.004)   |
| ≥50 years                                        |             | 5.67       | 1.84-17.50 (0.003)  |
| Duration of service                              | 323         |            |                     |
| 6 months-2 years                                 |             | 1          |                     |
| 3-10 years                                       |             | 5.69       | 1.31-24.72 (0.020)  |
| 11-19 years                                      |             | 9.48       | 2.12-42.35 (0.003)  |
| ≥20 years                                        |             | 13.39      | 2.61-68.56 (0.002)  |
| Cadre                                            | 325         |            |                     |
| Officer                                          |             | 1          |                     |
| Marshal Inspectorate                             |             | 1.69       | 0.92-3.09 (0.091)   |
| Road Marshal Assistant                           |             | 2.10       | 1.18-3.74 (0.012)   |
| Risk Perception for Occupational Exposure to HBV | 324         |            |                     |
| I don't know                                     |             | 1          |                     |
| No risk                                          |             | 3.92       | 0.78-19.63 (0.096)  |
| Low risk                                         |             | 11.33      | 2.94-43.63 (<0.001) |
| Moderate risk                                    |             | 9.61       | 2.85-32.43 (<0.001) |
| High risk                                        |             | 11.07      | 3.87-31.70 (<0.001) |
| Risk perception for Occupational Exposure to HBV | 324         |            |                     |
| No risk perceived                                |             | 1          |                     |
| Risk perceived                                   |             | 7.39       | 3.27-16.71 (<0.001) |
| HBV Knowledge Score                              | 325         | 1.37       | 1.15-1.62 (<0.001)  |
| HBVc Knowledge Score                             | 325         | 2.97       | 2.16-4.08 (<0.001)  |

245

246

247

248

**Table 5: Multivariate Binary Logistic Regression Analysis for Independent Predictors of Full-Dose Hepatitis B Vaccination Uptake among Members of FRSC, KSC, Nigeria, June-July, 2015.**

| Independent Variable                             | Adjusted Odds Ratio n=309 | 95% CI (p-value)   |
|--------------------------------------------------|---------------------------|--------------------|
| Sex                                              |                           |                    |
| Male                                             | 1                         |                    |
| Female                                           | 2.28                      | 1.15-4.52 (0.019)  |
| Age                                              |                           |                    |
| 18-29 years                                      | 1                         |                    |
| 30-39 years                                      | 1.40                      | 0.47-4.18 (0.542)  |
| 40-49 years                                      | 0.99                      | 0.28-3.55 (0.987)  |
| ≥50 years                                        | 1.08                      | 0.20-5.76 (0.931)  |
| Duration of service                              |                           |                    |
| 6 months-2 years                                 | 1                         |                    |
| 3-10 years                                       | 2.12                      | 0.39-11.41 (0.384) |
| 11-19 years                                      | 2.73                      | 0.45-16.59 (0.276) |
| ≥20 years                                        | 5.25                      | 0.68-40.47 (0.112) |
| Cadre                                            |                           |                    |
| Officer                                          | 1                         |                    |
| Marshal Inspectorate                             | 1.60                      | 0.77-3.33 (0.208)  |
| Road Marshal Assistant                           | 0.87                      | 0.41-1.85 (0.720)  |
| Risk Perception for Occupational Exposure to HBV |                           |                    |
| I don't know                                     | 1                         |                    |
| No risk                                          | 2.93                      | 0.47-18.41 (0.251) |
| Low risk                                         | 7.12                      | 1.47-34.47 (0.015) |
| Moderate risk                                    | 4.50                      | 1.03-19.63 (0.045) |
| High risk                                        | 3.90                      | 1.08-14.09 (0.038) |
| Risk perception for Occupational Exposure to HBV |                           |                    |
| No risk perceived                                | 1                         |                    |
| Risk perceived                                   | 2.86                      | 1.06-7.70 (<0.001) |
| HBV Knowledge Score                              | 1.03                      | 0.80-1.31 (0.843)  |
| HBVc Knowledge Score                             | 2.68                      | 1.83-3.92 (<0.001) |

249

250

1  
2  
3 251 In summary, full-dose HBVc was 30.5% while  $\geq 1$  dose coverage was 60.9%. Female sex,  
4  
5 252 perceiving their occupation as conveying a risk of HBV, and increasing HBVc knowledge were  
6  
7  
8 253 significant independent predictors of full-dose HBVc uptake among members of FRSC in  
9  
10 254 Kaduna State, Nigeria.  
11  
12

## 13 255 **DISCUSSION**

14  
15  
16  
17 256 Like all other studies on HCWs in Nigeria,[22-25] this study has further demonstrated high  
18  
19 257 HBVc initiation rate (60.9%) with low completion rate (30.5%). This completion rate implies  
20  
21 258 that only 30.5% of members of the FRSC, KSC were adequately protected against HBV  
22  
23 259 infection.[11] This means that almost 70% of these rescue workers perform their duties without  
24  
25 260 adequate protection from HBV. This also places the accident victims whom they seek to rescue  
26  
27 261 (children inclusive) at risk of infection with HBV from infected FRSC members. This could lead  
28  
29 262 to an unbroken cycle of infectivity, morbidity and mortality from HBV in a nation still struggling  
30  
31 263 with the HBV scourge. Poor uptake of HBVc among those at occupational risk of exposure to  
32  
33 264 HBV in Nigeria is a common observation across studies.[22-28] Adoption of a universal HBVc  
34  
35 265 policy in the country for HCWs and vulnerable PSWs could improve vaccine uptake. FRSC  
36  
37 266 members are exposed to blood and sharps injuries from accident scenes. In a nation with high  
38  
39 267 prevalence of chronic HBV,[5] HBVc coverage of 30.5% for FRSC members, KSC is low. A  
40  
41 268 sero-prevalence study to investigate the actual prevalence of HBV in these PSWs for appropriate  
42  
43 269 intervention is therefore recommended.  
44  
45  
46  
47  
48  
49

50  
51 270 Among FRSC members, females are 2.28 times more likely to be fully vaccinated against HBV  
52  
53 271 compared to their male counterparts. Osazuwa-Peters et al. observed a similar but insignificant  
54  
55 272 female preponderance in HBVc among dental professionals in Edo State, Nigeria.[29]  
56  
57  
58  
59  
60

1  
2  
3 273 Contrarily, Adekanle et al., in their survey of HCWs in Ile-Ife, Nigeria, observed 1.8 times  
4  
5 274 increased chances of males receiving HBVc compared to females,[27] although this finding may  
6  
7  
8 275 be due to males in the study being mainly doctors who had the advantage of professional  
9  
10 276 knowledge of HBVc. In this present study, females could probably be exposed to HBVc  
11  
12 277 knowledge during antenatal hospital visits and while taking their children for immunization.

13  
14  
15  
16 278 More than 50% of respondents perceived themselves at high risk of occupational exposure to  
17  
18 279 HBV. Disturbingly though, close to a quarter of participants claimed ignorance of their risk  
19  
20 280 status. Together with those who perceived themselves to be at no risk, 27.6% of FRSC members  
21  
22 281 had no risk perception for occupational exposure to HBV while 72.4% perceived themselves at  
23  
24 282 risk. This falls within the range of 30% to 78% risk perception observed in studies among HCWs  
25  
26 283 in Nigeria.[22,28] Despite high risk perception rate, having approximately 28% with no risk  
27  
28 284 perception for HBV is quite disconcerting from a public health perspective considering the  
29  
30 285 blood-skin exposure that rescue of accident victims could entail. Those who perceived  
31  
32 286 themselves at risk of occupational exposure to HBV were three times more likely to be  
33  
34 287 vaccinated than those without risk perception. All risk categories had higher odds of vaccination  
35  
36 288 compared to those without risk perception. It is therefore important that FRSC members  
37  
38 289 understand the risk of exposure to HBV (even if they feel it is low) as this appears to increase  
39  
40 290 their likelihood of getting vaccinated.  
41  
42  
43  
44  
45  
46

47 291 Knowledge of HBV and HBVc among study participants was poor. Less than 47% of  
48  
49 292 participants scored above the mean knowledge scores for HBV and HBVc. Knowledge was  
50  
51 293 poorest for the route of transmission of HBV and duration of protection from full-dose HBVc.  
52  
53 294 Not knowing the route of transmission of HBV means that FRSC members might take  
54  
55 295 inadequate precautions against HBV during rescue operations. It could also lead to  
56  
57  
58  
59  
60

1  
2  
3 296 stigmatization of FRSC members already infected with HBV due to wrong assumption of  
4  
5  
6 297 infectivity through casual contact with sweat and saliva. HBV knowledge score was however not  
7  
8 298 an independent predictor of HBVc in the study. This conflicts with Adekanle et al.'s observation  
9  
10 299 of twice increased likelihood of complete HBVc among those with good knowledge of HBV in  
11  
12 300 their survey of HCWs in Ile Ife, Nigeria.[27] Their study though did not elicit information on  
13  
14 301 HBVc knowledge, a potential confounder in the demonstrated association.

15  
16  
17  
18 302 Despite 62.9% of respondents describing HBVc as very effective, only 6.1% knew that full-dose  
19  
20 303 HBVc gives protection for  $\geq 20$  years. Knowing that receiving  $\geq 3$  doses of the vaccine can  
21  
22 304 provide lifetime protection from HBV could incentivize full-dose uptake. HBVc knowledge was  
23  
24 305 the most significant and precise independent predictor of full-dose HBVc in this study. This  
25  
26 306 contradicts Ogoina et al.'s finding of no significant association between HBVc knowledge and  
27  
28 307 full-dose vaccination among HCWs in two tertiary hospitals in Nigeria.[17] However, they did  
29  
30 308 not ascertain knowledge of vaccine effectiveness and duration of protection from full-dose  
31  
32 309 vaccination.

33  
34  
35  
36  
37  
38 310 Age, cadre and duration of service were not significantly associated with HBVc in this study.  
39  
40 311 Izegbu et al. observed more likelihood of HBVc with decreasing age,[30] while Sofola et al.  
41  
42 312 associated increasing cadre with HBVc.[31] In another instance, longer duration of service was  
43  
44 313 demonstrated to be associated with HBVc.[32] All these studies were among health professionals  
45  
46 314 who expectedly have professional exposure to HBV and HBVc knowledge unlike the present  
47  
48 315 study population.

49  
50  
51  
52  
53 316 Educational programme towards improvement of HBV and HBVc knowledge, and risk  
54  
55 317 perception among FRSC members is a recognized relevant public health intervention from this  
56  
57  
58  
59  
60

1  
2  
3 318 study. The programme can be included in the schedules of the already existing compulsory  
4  
5  
6 319 weekly in-house training/manpower development of staff and in the routine basic training  
7  
8 320 programme for new staff. Such enlightenment would be a cheap and easy intervention to  
9  
10 321 improve HBVc uptake. Existing evidence on the positive impact of educational intervention on  
11  
12 322 vaccine uptake is however weak.[33] The educational intervention should therefore be rigorously  
13  
14  
15 323 evaluated to ascertain its impact on HBVc uptake in FRSC members.  
16  
17

18 324 **Study Strengths and Limitations:**  
19

20  
21 325 This was a descriptive cross-sectional survey which limits its suitability for demonstrating  
22  
23 326 temporal relationships between explanatory and outcome variables.[34] It nevertheless shows  
24  
25 327 independent associations useful in understanding predictors of full-dose HBVc in this study  
26  
27 328 population so as to inform relevant public health interventions. Recall bias is another limitation  
28  
29 329 of this retrospective study design as participants may not have remembered accurately their  
30  
31 330 vaccination history thereby introducing information bias.[35] This was mitigated at the analysis  
32  
33 331 stage by omitting inconsistent data suggestive of guessing. Simple random sampling using the  
34  
35 332 staff register would have yielded a more representative sample;[21] disproportionate distribution  
36  
37 333 of such socio-demographic variables as sex and cadre in the study population made this  
38  
39 334 unfeasible. The response rate of 96.3% was however impressive and minimizes selection bias  
40  
41 335 thereby enhancing the generalizability of research findings by improving the external and  
42  
43 336 internal validity of the study.[36] The presence of Unit Commanders and other senior members  
44  
45 337 of staff at the meetings during data collection and their participation in the research could have  
46  
47 338 contributed to the high response rate. Subordinates who ordinarily may have declined  
48  
49 339 participation could have felt a psychological obligation to participate with their bosses. This  
50  
51 340 power influence was minimized by the use of PIS which emphasized voluntary participation, and  
52  
53  
54  
55  
56  
57  
58  
59  
60



1  
2  
3 341 by anonymous data collection procedures. While anonymity and self-administration of  
4  
5  
6 342 questionnaire could lessen social desirability bias, the use of social desirability scale would have  
7  
8 343 been more appropriate in demonstrating this bias for appropriate statistical control.[37]  
9  
10 344 Researcher bias was minimized by the use of a pre-validated questionnaire and by pre-  
11  
12 345 determining analytical strategies before data collection.[21] Possible exchange of information  
13  
14 346 among participants could have introduced information bias. This was mitigated by the presence  
15  
16 347 of the researcher during data collection with prior emphasis on non-communication between  
17  
18 348 participants. Some participants who claim ignorance of HBV might have a different designation  
19  
20 349 for the disease in the local language. This could bias the findings on HBV knowledge. Though  
21  
22 350 the study's questionnaire was adapted and pilot-tested to reflect the study context, it was not  
23  
24 351 tested for inter-rater reliability and validity within the study population. Missing data reduced  
25  
26 352 the sample size for the multivariate analysis from 341 to 309. This was less than the pre-study  
27  
28 353 estimate (323) and could lack sufficient power to detect significant associations, hence  
29  
30 354 predisposing to type II error.[21] It however constitutes a randomized 39% (309/789) of the  
31  
32 355 study population, which is a good representation.[38] Confounding, a known menace in  
33  
34 356 observational studies, was minimized at the analytical stage through multivariate logistic  
35  
36 357 regression.[21] The research estimates on the association of varied levels of risk perception with  
37  
38 358 full-dose HBVc had very wide 95% CIs. This could be due to random errors in the sample.[36]  
39  
40 359 A larger sample size in future studies could yield more precise estimates.  
41  
42  
43  
44  
45  
46  
47  
48

## 49 **CONCLUSION**

50  
51  
52 361 Controlling HBV transmission is an important public health issue internationally and in Nigeria  
53  
54 362 where the virus is hyperendemic. HBV infection is a preventable disease and prevention is best  
55  
56 363 achieved with HBVc.[6] FRSC members come in regular contact with blood and are at risk of  
57  
58  
59  
60

1  
2  
3 364 contracting HBV. HBVc coverage among FRSC members in Kaduna State, Nigeria is low  
4  
5  
6 365 (30.5%). Knowledge of HBV and HBVc is poor in this study population. Female sex, perceiving  
7  
8 366 there to be an occupational risk of exposure to HBV, and increasing HBVc knowledge are  
9  
10  
11 367 independent predictors of HBVc uptake among FRSC members, KSC. Educational intervention  
12  
13 368 aimed at improving awareness of the occupational risk of HBV and the importance of HBVc, is  
14  
15 369 required to improve HBVc coverage among this vulnerable group of PSWs. Recommended  
16  
17 370 future studies include: a qualitative study to ascertain FRSC members' perception of HBVc and  
18  
19 371 subjective reasons for non-uptake of the vaccine; a sero-prevalence study to determine the actual  
20  
21 372 immune status of FRSC members in KSC and estimate the prevalence of HBV in this study  
22  
23 373 group for appropriate intervention; and validation of questionnaire in the Nigerian context with  
24  
25 374 pretesting and retesting for reliability.  
26  
27  
28  
29

30 375 **ACKNOWLEDGMENTS:** University of Liverpool is acknowledged for providing the  
31  
32 376 platform for this research. We thank the Commonwealth Scholarship Commission for paying the  
33  
34 377 tuition fee for the MPH study of the corresponding author thereby enabling this dissertation  
35  
36 378 research. We appreciate the staff and management of the Federal Road Safety Corps, Kaduna  
37  
38 379 Sector Command for their cooperation and participation in this study.  
39  
40  
41  
42

#### 43 380 **REFERENCES**

- 44  
45  
46 381 1. World Health Organization (WHO). Hepatitis B. *WHO* 2015.  
47  
48 382 <http://www.who.int/mediacentre/factsheets/fs204/en/> (Accessed: 23<sup>rd</sup> July 2015).  
49  
50  
51 383 2. Meireles LC, Marinho RT, Van Damme P. Three Decades of Hepatitis B Control with  
52  
53 384 Vaccination. *World J Hepatol.* 2015;7:2127-32.  
54  
55 385 <https://www.ncbi.nlm.nih.gov/pmc/articles/PMC4550866/> (Accessed: 7 February 2017).  
56  
57  
58  
59  
60

- 1  
2  
3 386 3. Lemoine M, Eholie S, Lacombe K. Reducing the Neglected Burden of Viral Hepatitis in  
4  
5 387 Africa: Strategies for a Global Approach. *Journal of Hepatology* 2015;62:469-76.  
6  
7  
8 388 4. Mohamadkhani A, Katoonizadeh A, Poustchi H. Immune-Regulatory Events in the  
9  
10 389 Clearance of HBsAg in Chronic Hepatitis B: Focuses on HLA-DP. *Middle East J Dig Dis*  
11  
12 390 2015;7:5-13. <https://www.ncbi.nlm.nih.gov/pmc/articles/PMC4293802/> (Accessed: 8  
13  
14 391 February 2017).  
15  
16  
17 392 5. Schweitzer A, Horn J, Mikolajczyk RT, et al. Estimations of Worldwide Prevalence of  
18  
19 393 Chronic Hepatitis B Virus Infection: A Systematic Review of Data Published between  
20  
21 394 1965 and 2013. *The Lancet* 2015;386:1546-55.  
22  
23  
24 395 6. Lavanchy D. Chronic Viral Hepatitis as a Public Health Issue in the World. *Best Practice*  
25  
26 396 *& Research Clinical Gastroenterology* 2008;22(6):991-1008.  
27  
28  
29 397 7. Stockdale AJ, Geretti AM. Chronic Hepatitis B Infection in Sub-Saharan Africa: A Grave  
30  
31 398 Challenge and a Great Hope. *Trans R Soc Trop Med Hyg* 2015;109:421-22.  
32  
33  
34 399 8. Lozano R, Naghavi M, Foerman K, et al. Global and Regional Mortality from 235 Causes  
35  
36 400 of Death for 20 Age Groups in 1990 and 2010: A Systematic Analysis for the Global  
37  
38 401 Burden of Disease Study 2010. *Lancet* 2012;380:2095-128.  
39  
40  
41 402 9. Rischitelli G, Harris J, McCauley L, et al. The Risk of Acquiring Hepatitis B or C among  
42  
43 403 Public Safety Workers- A Systematic Review. *Am J Prev Med* 2001;20:299-306.  
44  
45  
46 404 10. World Health Organization (WHO). Table 1: Summary of WHO Position Papers-  
47  
48 405 Recommendations for Routine Immunization. *Immunization, Vaccines and Biologicals*  
49  
50 406 2014. [http://www.who.int/immunization/policy/immunization\\_tables/en/](http://www.who.int/immunization/policy/immunization_tables/en/) (Accessed: 20  
51  
52 407 February 2015).  
53  
54  
55  
56  
57  
58  
59  
60

- 1  
2  
3 408 11. Centers for Disease Control and Prevention (CDC). Immunization of Health-Care  
4  
5  
6 409 Personnel: Recommendations of the Advisory Committee on Immunization Practices  
7  
8 410 (ACIP). *Morbidity and Mortality Weekly Report (MMWR): Recommendations and*  
9  
10 411 *Reports* 2011;60(RR07):1-45.  
11  
12 412 <http://www.cdc.gov/mmwr/preview/mmwrhtml/rr6007a1.htm> (Accessed: 12th July  
13  
14 413 2015).  
15  
16  
17 414 12. Ophori EA, Tula MY, Azih AV et al. Current Trends of Immunization in Nigeria:  
18  
19  
20 415 Prospect and Challenges. *Trop Med health* 2014;42:67-75.  
21  
22 416 13. Gunnala R, Ogbuanu IU, Adegoke OJ, et al. Routine Vaccination Coverage in Northern  
23  
24 417 Nigeria: Results from 40 District-Level Cluster Surveys, 2014-2015. *PLoS One*  
25  
26 418 2016;11:e0167835. doi: 10.1371/journal.pone.0167835.  
27  
28  
29 419 14. Chidoka O. The Lead Agency Concept: Federal Road Safety Corps, Nigeria Experience.  
30  
31 420 Paper presented at the African Road Safety Management Workshop; 2014; Freetown,  
32  
33 421 Sierra Leone.  
34  
35 422 <http://www.ssatp.org/sites/ssatp/files/pdfs/Events/2014/Presentation%20Nigeria.pdf>  
36  
37 423 (Accessed: 19 April 2015).  
38  
39  
40 424 15. Federal Road Safety Corps (FRSC). Official Website. *Federal Government of Nigeria*  
41  
42 425 2015. <http://frsc.gov.ng/> (Accessed: 22 February 2015).  
43  
44  
45 426 16. Charan J, Biswas, T. How to Calculate Sample Size for Different Study Designs in  
46  
47 427 Medical Research? *Indian J Psychol Med* 2013;35:121-6.  
48  
49  
50 428 17. Ogoina D, Pondei K, Adetunji B, et al. Prevalence of Hepatitis B Vaccination among  
51  
52 429 Health Care Workers in Nigeria in 2011-12. *Int J Occup Environ Med* 2014;5:51-56.  
53  
54  
55  
56  
57  
58  
59  
60

- 1  
2  
3 430 18. Whitley E, Ball J. Statistics Review 4: Sample Size Calculations. *Crit Care* 2002;6:335-  
4  
5 431 41.  
6  
7  
8 432 19. Hammer GP, Prel J-B, Blettner M. Avoiding Bias in Observational Studies. *Dtsch Arztebl*  
9  
10 433 *Int* 2009;106:664-8.  
11  
12 434 20. Al-Hussami M. Knowledge and Acceptance of Hepatitis B Vaccine. *The Internet Journal*  
13 435 *of Healthcare Administration* 2001;2. <https://ispub.com/IJHCA/2/1/5725> (Accessed: 20th  
14  
15 436 April 2015).  
16  
17 437 21. Bruce N, Pope D, Stanistreet D. Quantitative Methods for Health Research: A practical  
18  
19 438 Interactive Guide to Epidemiology and Statistics. Chichester, UK: Wiley 2008.  
20  
21 439 22. Ibekwe RC, Ibeziako N. Hepatitis B Vaccination Status among Health Workers in Enugu.  
22  
23 440 *Niger J Clin Pract* 2006;9:7-10.  
24  
25 441 23. Fatusi AO, Fatusi OA, Esimai AO, et al. Acceptance of Hepatitis B Vaccine by Workers  
26  
27 442 in a Nigerian Teaching Hospital. *East Afr Med J* 2000;77:608-12.  
28  
29 443 24. Okwara EC, Enwere OO, Diwe CK, et al. Theatre and Laboratory Workers' Awareness  
30  
31 444 of and Safety Practices against Hepatitis B and C Infection in a Suburban University  
32  
33 445 Teaching Hospital in Nigeria. *Pan Afr Med J* 2012;13:2-6.  
34  
35 446 25. Paul N, Peterside O. Hepatitis B Vaccination Rate among Medical Students at the  
36  
37 447 University of Port Harcourt Teaching Hospital (UPTH). *World Journal of Vaccines*  
38  
39 448 2015;55:1-7. <http://dx.doi.org/10.4236/wjv.2015.51001> (Accessed: 22 June 2015).  
40  
41 449 26. Azodo CC, Ehizele AO, Uche I, Erhabor P. Hepatitis-B Vaccination Status among Dental  
42  
43 450 Surgeons in Benin City, Nigeria. *Ann Med Health Sci Res* 2012;2:24-8.  
44  
45 451 27. Adekanle O, Ndububa DA, Olowookere SA, et al. Knowledge of Hepatitis B Virus  
46  
47 452 Infection, Immunization with Hepatitis B Vaccine, Risk Perception, and Challenges to  
48  
49  
50  
51  
52  
53  
54  
55  
56  
57  
58  
59  
60

- 1  
2  
3 453 Control Hepatitis among Hospital Workers in a Nigerian Tertiary Hospital. *Hepatitis*  
4  
5  
6 454 *Research and Treatment* 2015;2015:1-6 [Online]. Available from:  
7  
8 455 <http://dx.doi.org/10.1155/2015/439867> (Accessed: 23 May 2015).  
9  
10 456 28. Adebamowo CA, Odukogbe AA, Ajuwon AJ. Knowledge, Attitude, and Practices  
11  
12 457 Related to Hepatitis B Virus Infection among Nigerian Obstetricians and Midwives. *J*  
13  
14 458 *Obstet Gynaecol* 1998;18:528-32.  
15  
16  
17 459 29. Osazuwa-Peters N, Azodo CC, Ehizele AO, Obuekwe ON. Gender Differences in  
18  
19 460 Characteristics, Occupational Exposure, and Infection Control Practices among Dental  
20  
21 461 Professionals in Edo State, Nigeria. *South Afr J of Epidemiol Infect* 2012;27:61-5.  
22  
23  
24 462 30. Izegbu MC, Amole OO, Ajayi GO. Attitudes, Perception and Practice of Workers in  
25  
26 463 Laboratories in the Two Colleges of Medicine and their Teaching Hospitals in Lagos  
27  
28 464 State, Nigeria as Regards Universal Precaution Measures. *Biomedical Research*  
29  
30 465 2006;17:49-54.  
31  
32  
33 466 31. Sofola OO, Uti OG. Hepatitis B Virus Infection and Prevention in the Dental Clinic:  
34  
35 467 Knowledge and Factors Determining Vaccine Uptake in a Nigerian Dental Teaching  
36  
37 468 Hospital. *Nig Q J Hosp Med* 2008;18:145-48.  
38  
39  
40 469 32. Olubuyide IO, Ola SO, Aliyu B, et al. Hepatitis B and C in Doctors and Dentists in  
41  
42 470 Nigeria. *Q J Med* 1997;90:417-22.  
43  
44  
45 471 33. Dube E, Gagnon D, MacDonald NE, the SAGE Working Group on Vaccine Hesitancy.  
46  
47 472 Strategies Intended to Address Vaccine Hesitancy: Review of Published Reviews.  
48  
49 473 *Vaccine* 2015;33:4191-203.  
50  
51  
52  
53 474 34. Carlson MDA, Morrison RS. Study Design, Precision, and Validity in Observational  
54  
55 475 Studies. *J Palliat Med* 2009;12:77-82.  
56  
57  
58  
59  
60

- 1  
2  
3 476 35. Neugebauer R, Ng S. Differential Recall as a Source of Bias in Epidemiologic Research.  
4  
5  
6 477 *J Clin Epidemiol* 1990;43:1337-41.  
7  
8 478 36. Knottnerus JA, Tugwell P. Selection-Related Bias, An Ongoing Concern in Doing and  
9  
10 479 Publishing Research. *J Clin Epidemiol* 2014;67:1057-8.  
11  
12  
13 480 [http://www.jclinepi.com/article/S0895-4356\(14\)00332-1/pdf](http://www.jclinepi.com/article/S0895-4356(14)00332-1/pdf) (Accessed: 15 September  
14  
15 481 2015).  
16  
17 482 37. van de Mortel TF. Faking it: Social Desirability Response Bias in Self-Report Research.  
18  
19 483 *Aust J Adv Nurs* 2008;25:40-48. [http://www.ajan.com.au/ajan\\_25.4.html](http://www.ajan.com.au/ajan_25.4.html) (Accessed: 12  
20  
21 484 February 2017).  
22  
23  
24 485 38. Kadam P, Bhalerao, S. Sample Size Calculation. *Int J Ayurveda Res* 2010;1:55-57.  
25  
26  
27 486  
28  
29 487  
30  
31 488  
32  
33 489  
34  
35 490  
36  
37 491  
38  
39  
40  
41  
42  
43  
44  
45  
46  
47  
48  
49  
50  
51  
52  
53  
54  
55  
56  
57  
58  
59  
60

## APPENDIX A: ADAPTED STUDY QUESTIONNAIRE

## HEPATITIS B VACCINATION QUESTIONNAIRE

## For Official Use Only

Researcher.....

Questionnaire no: 

Date of Data Collection (DD/MM/YY).....

**IMPLIED CONSENT (Please read before completing questionnaire):** Having gone through the research information contained in the participant information sheet, by completing this questionnaire you are consenting to participate in the study. If you do not wish to complete the questionnaire, please put the blank version into the envelope and I will collect it with all other questionnaires.

Thank you.

**Please only complete the questionnaire if you are aged 18 years and above and have at least 6 months of service with FRSC**

**Note:** This questionnaire is anonymous; please do not write your name on it. Kindly give an answer to all the questions as it pertains to you and please answer as truthfully as you can.

Please check (✓) only the box that most correctly answers the question, making sure you make only one selection for each question except where otherwise indicated.

**Section A: Demographic Questions**

1. What is your sex?

Male

Female



2. What was your age on your last birthday?

- 18 to 29 years
- 30 to 39 years
- 40 to 49 years
- 50 years and above

### Section B: Employment History

3. How long have you worked with Federal Road Safety Corps (FRSC)?

- 6 months to 2 years
- 3 years to 10 years
- 11 years to 19 years
- 20 years and above

4. What is your cadre?

- Officer
- Marshal Inspectorate
- Road Marshal Assistant

5. Please check (✓) the box below your rank

| ACM | CC | DCC | ACC | CRC | SRC | RC | DRC | ARC |
|-----|----|-----|-----|-----|-----|----|-----|-----|
|     |    |     |     |     |     |    |     |     |

| CI | DCI | ACI | PMI | SMI | MI-I | MI-II | MI-III | CRMA | DCRMA | SRMA | RMAI | RMAII | RMAIII |
|----|-----|-----|-----|-----|------|-------|--------|------|-------|------|------|-------|--------|
|    |     |     |     |     |      |       |        |      |       |      |      |       |        |

### Section C: Perception of Risk of Exposure to Hepatitis B Virus

6. Have you ever heard about hepatitis B virus infection?

Yes

No

7. How serious do you think being infected with hepatitis B virus is compared to HIV?

Less serious than HIV

As serious as HIV

More serious than HIV

I don't know

8. How can someone be infected with hepatitis B virus? (please check (✓) all the correct boxes if your answer is more than one)

Through contact with blood of an infected person

Through contact with saliva of an infected person

Through contact with sweat of an infected person

Through contact with body fluid contaminated by blood of an infected person

I don't know

1  
2  
3  
4 9. How much do you think your work with FRSC exposes you to the risk of  
5 contracting hepatitis B virus infection?  
6

- 7  No risk of exposure  
8  
9  Low risk of exposure  
10  
11  Moderate risk of exposure  
12  
13  High risk of exposure  
14  
15  I don't know  
16  
17  
18  
19

20 **Section D: Hepatitis B vaccination Knowledge and Status**  
21

22  
23 10. Have you ever heard about hepatitis B vaccination?  
24

- 25  Yes  
26  
27  No  
28  
29

30 11. How effective do you think hepatitis B vaccination is in protecting someone  
31 against hepatitis B virus infection?  
32  
33

- 34  Not effective  
35  
36  Slightly effective  
37  
38  Very effective  
39  
40  I don't know  
41  
42  
43  
44

45 12. Have you ever received hepatitis B vaccination?  
46

- 47  Yes  
48  
49  No  
50  
51

52 **If your answer to question 12 is 'No', answer question 13; if it is 'Yes', go to**  
53 **question 14**  
54  
55

1  
2  
3  
4  
5  
6  
7  
8  
9  
10  
11  
12  
13  
14  
15  
16  
17  
18  
19  
20  
21  
22  
23  
24  
25  
26  
27  
28  
29  
30  
31  
32  
33  
34  
35  
36  
37  
38  
39  
40  
41  
42  
43  
44  
45  
46  
47  
48  
49  
50  
51  
52  
53  
54  
55  
56  
57  
58  
59  
60

13. Why have you not received hepatitis B vaccination? (Please check (✓) all the correct boxes if your answer is more than one)

- I am not aware of hepatitis B vaccination
- I do not know where to go and receive it
- I don't have time
- It is expensive
- I don't see the need
- I am afraid of contracting the virus from the vaccine
- Others (please state).....

14. If your answer to question 12 is 'Yes', how many doses of hepatitis B vaccine have you received?

- 1 dose
- 2 doses
- 3 doses
- More than 3 doses

15. When did you receive the last dose of hepatitis B vaccine?

- Less than 1 month ago
- 1 month to 3 months ago
- 4 months to 6 months ago
- More than 6 months ago

1  
2  
3  
4  
5  
6  
7  
8  
9  
10  
11  
12  
13  
14  
15  
16  
17  
18  
19  
20  
21  
22  
23  
24  
25  
26  
27  
28  
29  
30  
31  
32  
33  
34  
35  
36  
37  
38  
39  
40  
41  
42  
43  
44  
45  
46  
47  
48  
49  
50  
51  
52  
53  
54  
55  
56  
57  
58  
59  
60

16. What do you think is the recommended full dose of hepatitis B vaccine?

- 1 dose
- 2 doses
- 3 or more doses
- I don't know

17. How long does a full dose of hepatitis B vaccine protect someone?

- Less than 1 year
- 1 year to 5 years
- 6 years to 10 years
- 11 years to 19 years
- 20 years or more
- I don't know

**Thank you for your time!**

## APPENDIX B: Knowledge Scoring Table

Scoring Table: HBV (A) and HBVc (B) Knowledge Questions and Scoring Pattern

| A. Question                                                                                                                          | Options checked                                                                 | Score             |
|--------------------------------------------------------------------------------------------------------------------------------------|---------------------------------------------------------------------------------|-------------------|
| Have you heard about hepatitis B virus infection? <b>(one option)</b>                                                                | Yes (✓)                                                                         | 1                 |
|                                                                                                                                      | No (✓)                                                                          | 0                 |
| How serious do you think being infected with hepatitis B virus is compared to HIV? <b>(one option)</b>                               | Less serious than HIV (✓)                                                       | 0                 |
|                                                                                                                                      | As serious as HIV (✓)                                                           | 0                 |
|                                                                                                                                      | More serious than HIV (✓)                                                       | 1                 |
|                                                                                                                                      | I don't know (✓)                                                                | 0                 |
| How can someone be infected with hepatitis B virus? (please check (✓) all the correct boxes if your answer is more than one)         | Through contact with blood of an infected person (✓)                            | 1                 |
|                                                                                                                                      | Through contact with saliva of an infected person <b>(blank)*</b>               | 1                 |
|                                                                                                                                      | Through contact with sweat of an infected person <b>(blank)*</b>                | 1                 |
|                                                                                                                                      | Through contact with body fluid contaminated by blood of an infected person (✓) | 1                 |
|                                                                                                                                      | I don't know (✓)                                                                | 0 for all options |
| Maximum HBV knowledge Score                                                                                                          |                                                                                 | 6 of 6            |
| Minimum HBV knowledge Score                                                                                                          |                                                                                 | 0 of 6            |
| B. Question                                                                                                                          | Options                                                                         | Score             |
| Have you ever heard about hepatitis B vaccination? <b>(one option)</b>                                                               | Yes (✓)                                                                         | 1                 |
|                                                                                                                                      | No (✓)                                                                          | 0                 |
| How effective do you think hepatitis B vaccination is in protecting someone against hepatitis B virus infection? <b>(one option)</b> | Not effective (✓)                                                               | 0                 |
|                                                                                                                                      | Slightly effective (✓)                                                          | 0                 |
|                                                                                                                                      | Very effective (✓)                                                              | 1                 |
|                                                                                                                                      | I don't know (✓)                                                                | 0                 |
| What do you think is the recommended full dose of hepatitis B vaccine? <b>(one option)</b>                                           | 1 dose (✓)                                                                      | 0                 |
|                                                                                                                                      | 2 doses (✓)                                                                     | 0                 |
|                                                                                                                                      | 3 or more doses (✓)                                                             | 1                 |
|                                                                                                                                      | I don't know (✓)                                                                | 0                 |
| How long does a full dose of hepatitis B vaccine protect                                                                             | Less than 1 year (✓)                                                            | 0                 |

| A. Question                  | Options checked          | Score  |
|------------------------------|--------------------------|--------|
| someone? (one option)        | 1 year to 5 years (✓)    | 0      |
|                              | 6 years to 10 years (✓)  | 0      |
|                              | 11 years to 19 years (✓) | 0      |
|                              | 20 years or more (✓)     | 1      |
|                              | I don't know (✓)         | 0      |
| Maximum HBVc knowledge score |                          | 4 of 4 |
| Minimum HBVc knowledge score |                          | 0 of 4 |

\* HBV can be found in saliva but the concentration is very low compared to blood; direct injection through bites is required to transmit the virus via this medium.<sup>1,2</sup> Transmission has not been observed through sweat.<sup>1</sup>

### References:

1. Canadian Center for Occupational Health and Safety (CCOHS). Hepatitis B. *OSH Facts Sheet* 2014. [http://www.ccohs.ca/oshanswers/diseases/hepatitis\\_b.html](http://www.ccohs.ca/oshanswers/diseases/hepatitis_b.html) (Accessed: 27th July 2015).
2. Centers for Disease Control and Prevention (CDC). When Someone Close to You has Viral Hepatitis. *Division of Viral Hepatitis* 2010. <http://www.cdc.gov/hepatitis/HBV/PDFs/HepBWhenSomeoneClose.pdf> (Accessed: 26th June 2015).

**Appendix C: Frequency of Available Data and Missing Data from Completed Questionnaires, Federal Road Safety Corps, Kaduna Sector Command, Nigeria, June-July, 2015**

| Variable                                     | Valid Sample Size | Available Data | Percentage | Missing Data | Percentage |
|----------------------------------------------|-------------------|----------------|------------|--------------|------------|
| Sex                                          | 341               | 327            | 95.9       | 14           | 4.1        |
| Age                                          | 341               | 338            | 99.1       | 3            | 0.9        |
| Duration of Service                          | 341               | 339            | 99.4       | 2            | 0.6        |
| Cadre                                        | 341               | 341            | 100        | 0            | 0          |
| Ever heard of HBV infection?                 | 341               | 340            | 99.7       | 1            | 0.3        |
| Seriousness of HBV compared to HIV           | 341               | 335            | 98.2       | 6            | 1.8        |
| Route of Transmission of HBV                 | 341               | 337            | 98.8       | 4            | 1.2        |
| Perception of Risk of exposure to HBV        | 341               | 340            | 99.7       | 1            | 0.3        |
| Ever heard of hepatitis B vaccination?       | 341               | 336            | 98.5       | 5            | 1.5        |
| Effectiveness of hepatitis B vaccination     | 341               | 334            | 97.9       | 7            | 2.1        |
| Ever received hepatitis B vaccination?       | 341               | 325            | 95.3       | 16           | 4.7        |
| Number of doses received                     | 198               | 198            | 100        | 0            | 0          |
| Recommended full dose of hepatitis B vaccine | 341               | 308            | 90.3       | 33           | 9.7        |
| Duration of protection from full-dose HBVc   | 341               | 312            | 91.5       | 29           | 8.5        |



STROBE 2007 (v4) Statement—Checklist of items that should be included in reports of *cross-sectional studies*

| Section/Topic                | Item # | Recommendation                                                                                                                                                                       | Reported on page # |
|------------------------------|--------|--------------------------------------------------------------------------------------------------------------------------------------------------------------------------------------|--------------------|
| Title and abstract           | 1      | (a) Indicate the study's design with a commonly used term in the title or the abstract                                                                                               | 1                  |
|                              |        | (b) Provide in the abstract an informative and balanced summary of what was done and what was found                                                                                  | 3,4                |
| <b>Introduction</b>          |        |                                                                                                                                                                                      |                    |
| Background/rationale         | 2      | Explain the scientific background and rationale for the investigation being reported                                                                                                 | 5-7                |
| Objectives                   | 3      | State specific objectives, including any prespecified hypotheses                                                                                                                     | 7                  |
| <b>Methods</b>               |        |                                                                                                                                                                                      |                    |
| Study design                 | 4      | Present key elements of study design early in the paper                                                                                                                              | 7                  |
| Setting                      | 5      | Describe the setting, locations, and relevant dates, including periods of recruitment, exposure, follow-up, and data collection                                                      | 7-10               |
| Participants                 | 6      | (a) Give the eligibility criteria, and the sources and methods of selection of participants                                                                                          | 9,10               |
| Variables                    | 7      | Clearly define all outcomes, exposures, predictors, potential confounders, and effect modifiers. Give diagnostic criteria, if applicable                                             | 11-12              |
| Data sources/<br>measurement | 8*     | For each variable of interest, give sources of data and details of methods of assessment (measurement). Describe comparability of assessment methods if there is more than one group | 9-12               |
| Bias                         | 9      | Describe any efforts to address potential sources of bias                                                                                                                            | 9-13               |
| Study size                   | 10     | Explain how the study size was arrived at                                                                                                                                            | 9                  |
| Quantitative variables       | 11     | Explain how quantitative variables were handled in the analyses. If applicable, describe which groupings were chosen and why                                                         | 10-13              |
| Statistical methods          | 12     | (a) Describe all statistical methods, including those used to control for confounding                                                                                                | 10-13              |
|                              |        | (b) Describe any methods used to examine subgroups and interactions                                                                                                                  | NA                 |
|                              |        | (c) Explain how missing data were addressed                                                                                                                                          | 13                 |
|                              |        | (d) If applicable, describe analytical methods taking account of sampling strategy                                                                                                   | 10-13              |
|                              |        | (e) Describe any sensitivity analyses                                                                                                                                                | NA                 |
| <b>Results</b>               |        |                                                                                                                                                                                      |                    |

|                          |     |                                                                                                                                                                                                              |       |
|--------------------------|-----|--------------------------------------------------------------------------------------------------------------------------------------------------------------------------------------------------------------|-------|
| Participants             | 13* | (a) Report numbers of individuals at each stage of study—eg numbers potentially eligible, examined for eligibility, confirmed eligible, included in the study, completing follow-up, and analysed            | 13-18 |
|                          |     | (b) Give reasons for non-participation at each stage                                                                                                                                                         | 13    |
|                          |     | (c) Consider use of a flow diagram                                                                                                                                                                           | NA    |
| Descriptive data         | 14* | (a) Give characteristics of study participants (eg demographic, clinical, social) and information on exposures and potential confounders                                                                     | 13,14 |
|                          |     | (b) Indicate number of participants with missing data for each variable of interest                                                                                                                          | 13    |
| Outcome data             | 15* | Report numbers of outcome events or summary measures                                                                                                                                                         | 16    |
| Main results             | 16  | (a) Give unadjusted estimates and, if applicable, confounder-adjusted estimates and their precision (eg, 95% confidence interval). Make clear which confounders were adjusted for and why they were included | 16-18 |
|                          |     | (b) Report category boundaries when continuous variables were categorized                                                                                                                                    | 12    |
|                          |     | (c) If relevant, consider translating estimates of relative risk into absolute risk for a meaningful time period                                                                                             | NA    |
| Other analyses           | 17  | Report other analyses done—eg analyses of subgroups and interactions, and sensitivity analyses                                                                                                               | NA    |
| <b>Discussion</b>        |     |                                                                                                                                                                                                              |       |
| Key results              | 18  | Summarise key results with reference to study objectives                                                                                                                                                     | 19    |
| Limitations              | 19  | Discuss limitations of the study, taking into account sources of potential bias or imprecision. Discuss both direction and magnitude of any potential bias                                                   | 22-23 |
| Interpretation           | 20  | Give a cautious overall interpretation of results considering objectives, limitations, multiplicity of analyses, results from similar studies, and other relevant evidence                                   | 19-22 |
| Generalisability         | 21  | Discuss the generalisability (external validity) of the study results                                                                                                                                        | 22,23 |
| <b>Other information</b> |     |                                                                                                                                                                                                              |       |
| Funding                  | 22  | Give the source of funding and the role of the funders for the present study and, if applicable, for the original study on which the present article is based                                                | 2     |

\*Give information separately for cases and controls in case-control studies and, if applicable, for exposed and unexposed groups in cohort and cross-sectional studies.

**Note:** An Explanation and Elaboration article discusses each checklist item and gives methodological background and published examples of transparent reporting. The STROBE checklist is best used in conjunction with this article (freely available on the Web sites of PLoS Medicine at <http://www.plosmedicine.org/>, Annals of Internal Medicine at <http://www.annals.org/>, and Epidemiology at <http://www.epidem.com/>). Information on the STROBE Initiative is available at [www.strobe-statement.org](http://www.strobe-statement.org).
